# Supplementary material for: Artemannuols A–C, novel sesquiterpenoid–flavonol hybrids with antihepatoma activity from Artemisia annua
Source: Royal Society of Chemistry journal article supplement (doi:10.1039/d3ob00780d), 2023-01-01
Supplement: d3ob00780d1.pdf [file d3ob00780d1.pdf]

## SUPPLEMENTARY INFORMATION

### **Artemannuols A–C, three novel sesquiterpenoid-flavonol hybrids with antihepatoma activity from *Artemisia annua***

Xiao-Feng He,<sup>a</sup> Meng-Fei Wang,<sup>a,b</sup> Tian-Ze Li,<sup>a</sup> Yun-Bao Ma,<sup>a</sup> and Ji-Jun Chen<sup>\*a,b</sup>

<sup>a</sup>State Key Laboratory of Phytochemistry and Plant Resources in West China, Kunming Institute of Botany, Chinese Academy of Sciences, Kunming 650201, People's Republic of China

<sup>b</sup>University of Chinese Academy of Sciences, Beijing 100049, People's Republic of China

\*Corresponding author. Prof. Dr. Ji-Jun Chen, State Key Laboratory of Phytochemistry and Plant Resources in West China, Kunming Institute of Botany, Chinese Academy of Sciences, 132# Lanhei Road, Kunming 650201, Yunnan, *People's Republic of China*.

Tel.: +86 871 65223265, Fax: +86 871 65227197, *E-mail address*: [chenjj@mail.kib.ac.cn](mailto:chenjj@mail.kib.ac.cn) (Ji-Jun Chen).

## List of Supplementary Information

|                                                                                                                                                                                            |    |
|--------------------------------------------------------------------------------------------------------------------------------------------------------------------------------------------|----|
| General Experimental Instruments and Procedures .....                                                                                                                                      | 4  |
| ECD Calculations .....                                                                                                                                                                     | 4  |
| Antihepatoma assay .....                                                                                                                                                                   | 4  |
| Figure S1. Key chemical shifts difference of 1-bisabolen-3-ols according to the references ( <i>J. Nat. Prod.</i> , 2014, 77, 1708–1717; <i>J. Chem. Eco.</i> , 2014, 40, 1260–1268) ..... | 5  |
| S1. <sup>1</sup> H NMR (600 MHz, acetone-d <sub>6</sub> ) of compound 1 .....                                                                                                              | 6  |
| S2. <sup>13</sup> C NMR (DEPT) (150 MHz, acetone-d <sub>6</sub> ) of compound 1 .....                                                                                                      | 7  |
| S3. <sup>1</sup> H- <sup>1</sup> H COSY (600 MHz, acetone-d <sub>6</sub> ) of compound 1 .....                                                                                             | 8  |
| S4. HSQC (600 MHz, acetone-d <sub>6</sub> ) of compound 1 .....                                                                                                                            | 8  |
| S5. HMBC (600 MHz, acetone-d <sub>6</sub> ) of compound 1 .....                                                                                                                            | 9  |
| S6. ROESY (600 MHz, acetone-d <sub>6</sub> ) of compound 1 .....                                                                                                                           | 9  |
| S7. [α] <sub>D</sub> spectrum of compound 1 in MeOH .....                                                                                                                                  | 10 |
| S8. IR of compound 1 .....                                                                                                                                                                 | 10 |
| S9. ECD and UV of compound 1 .....                                                                                                                                                         | 11 |
| S10. HRESIMS of compound 1 .....                                                                                                                                                           | 12 |
| S11. <sup>1</sup> H NMR (600 MHz, acetone-d <sub>6</sub> ) of compound 2 .....                                                                                                             | 13 |
| S12. <sup>13</sup> C NMR (DEPT) (150 MHz, acetone-d <sub>6</sub> ) of compound 2 .....                                                                                                     | 14 |
| S13. <sup>1</sup> H- <sup>1</sup> H COSY (600 MHz, acetone-d <sub>6</sub> ) of compound 2 .....                                                                                            | 15 |
| S14. HSQC (600 MHz, acetone-d <sub>6</sub> ) of compound 2 .....                                                                                                                           | 15 |
| S15. HMBC (600 MHz, acetone-d <sub>6</sub> ) of compound 2 .....                                                                                                                           | 16 |
| S16. ROESY (600 MHz, acetone-d <sub>6</sub> ) of compound 2 .....                                                                                                                          | 16 |
| S17. [α] <sub>D</sub> spectrum of compound 2 in MeOH .....                                                                                                                                 | 17 |
| S18. IR of compound 2 .....                                                                                                                                                                | 17 |
| S19. ECD and UV of compound 2 .....                                                                                                                                                        | 18 |
| S20. HRESIMS of compound 2 .....                                                                                                                                                           | 19 |
| S22. <sup>13</sup> C NMR (DEPT) (150 MHz, CD <sub>3</sub> OD) of compound 3 .....                                                                                                          | 21 |
| S23. <sup>1</sup> H- <sup>1</sup> H COSY (600 MHz, CD <sub>3</sub> OD) of compound 3 .....                                                                                                 | 21 |
| S24. HSQC (600 MHz, CD <sub>3</sub> OD) of compound 3 .....                                                                                                                                | 22 |
| S25. HMBC (600 MHz, CD <sub>3</sub> OD) of compound 3 .....                                                                                                                                | 22 |
| S26. ROESY (600 MHz, CD <sub>3</sub> OD) of compound 3 .....                                                                                                                               | 23 |
| S27. [α] <sub>D</sub> spectrum of compound 3 in MeOH .....                                                                                                                                 | 23 |

|                                     |    |
|-------------------------------------|----|
| S28. IR of compound 3 .....         | 24 |
| S29. ECD and UV of compound 3 ..... | 25 |
| S30. HRESIMS of compound 3 .....    | 26 |

## General Experimental Instruments and Procedures

A Shimadzu LC/MS-IT-TOF mass spectrometer (Shimadzu, Kyoto, Japan) was used to gain the HRESIMS. UV spectra were conducted on a Shimadzu UV2401PC spectrophotometer (Shimadzu, Kyoto, Japan), and IR (KBr) spectra were obtained on a Bio-Rad FTS-135 spectrometer (Hercules, California, USA). 1D and 2D NMR spectra were conducted on Advance III-600 spectrometers (Bruker, Bremerhaven, Germany) with TMS as the internal standard. Optical rotations were determined on a JASCO P-1020 digital polarimeter (Horiba, Tokyo, Japan). Electronic circular dichroism (ECD) spectra were measured on an Applied Photophysics Circular Dichromatograph (Applied Photophysics, Britain). Thin-layer chromatography (TLC) analyses were performed on silica gel GF<sub>254</sub> plates (Yantai Jiangyou Silicon Development Company, Yantai, China), and spots were monitored under UV light or by heating after sprayed with 10% H<sub>2</sub>SO<sub>4</sub> in EtOH (*v/v*). Silica gel (200~300 mesh, Linyi Haixiang, Linyi, China) and Sephadex LH-20 (GE Healthcare Bio-Sciences AB, Uppsala, Sweden) were used for column chromatography. High performance liquid chromatography (HPLC) was performed on a Shimadzu LC-CBM-20 system (Shimadzu, Kyoto, Japan) with Agilent XDB-C<sub>18</sub> (5  $\mu$ m, 9.4  $\times$  250 mm) columns.

## ECD Calculations

The conformation search was performed by Spartan '14 software using molecular mechanics MMFF94x. The appropriate low-energy conformers were selected and optimized in the gas phase by semi-empirical method in Gaussian 09 program package, and were further optimized and analyzed for frequency using the density functional theory (DFT) at the B3LYP/6-31G(d,p) level, resulting in no imaginary frequencies. Solvent effects were taken into consideration by using the conductor polarizable continuum model (CPCM). All the conformers were used for calculating electronic circular dichroism (ECD) by the time-dependent density functional theory (TD-DFT) method at the B3LYP/6-31G(d,p) level with the CPCM model in MeOH.<sup>1</sup> The overall calculated ECD curves were generated by Boltzmann weighting of the selected low-energy conformers using SpecDis 1.62 with  $\sigma = \sim 0.3$  eV.

## Antihepatoma assay

The antihepatoma assay of the compounds **1–3** was tested by the MTT assay. Briefly, cells in a density of  $3 \times 10^4$  cells/well were seeded into 96-well plates and incubated at 37 °C with 5% CO<sub>2</sub> for 24 h. The culture medium was replaced with fresh medium containing different concentrations of **compounds 1–3**, and cells were incubated for additional 48 h. After removal of the medium, 100  $\mu$ L of MTT reagent (1mg/mL) was added into each well, and the plates were kept in incubator for 4 h. After that, 100  $\mu$ L of dimethyl sulfoxide (DMSO) was added into each well, and the plates were measured at 490 nm using microplate reader (BIO-RAD, USA). The inhibitory ratio was calculated as  $[(A_{490} \text{ control} - A_{490} \text{ treated})/A_{490} \text{ control}] \times 100\%$ . The antihepatoma assay of compounds was expressed as IC<sub>50</sub> values calculated by GraphPad Prism 5 (GraphPad Software, California, USA).

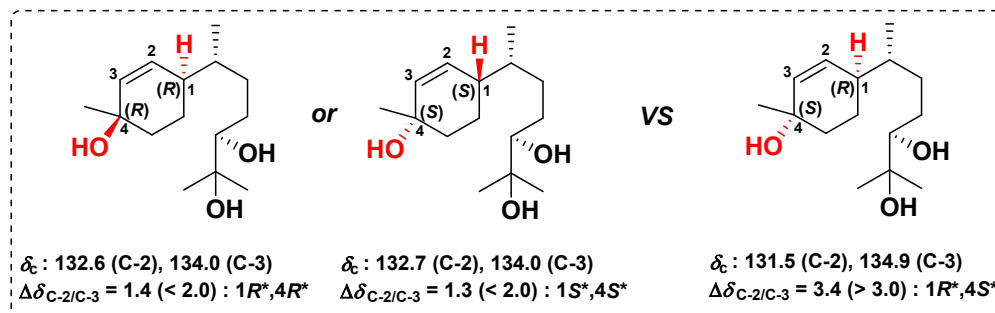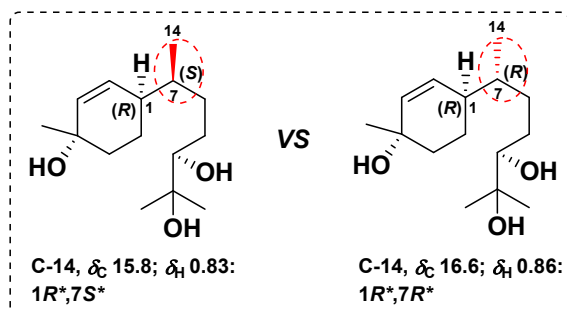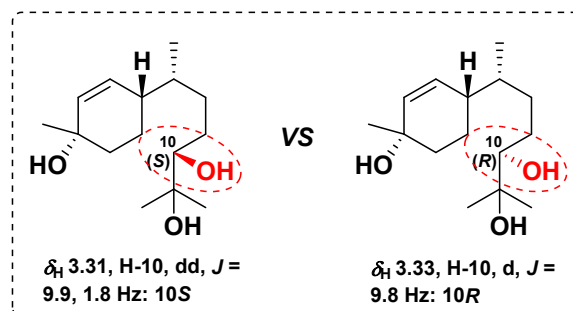

**Figure S1.** Key chemical shifts differences of 1-bisabolene-3-ols according to the references (*J. Nat. Prod.*, 2014, 77, 1708–1717; *J. Chem. Eco.*, 2014, 40, 1260–1268)

S1. <sup>1</sup>H NMR (600 MHz, acetone-d<sub>6</sub>) of compound 1

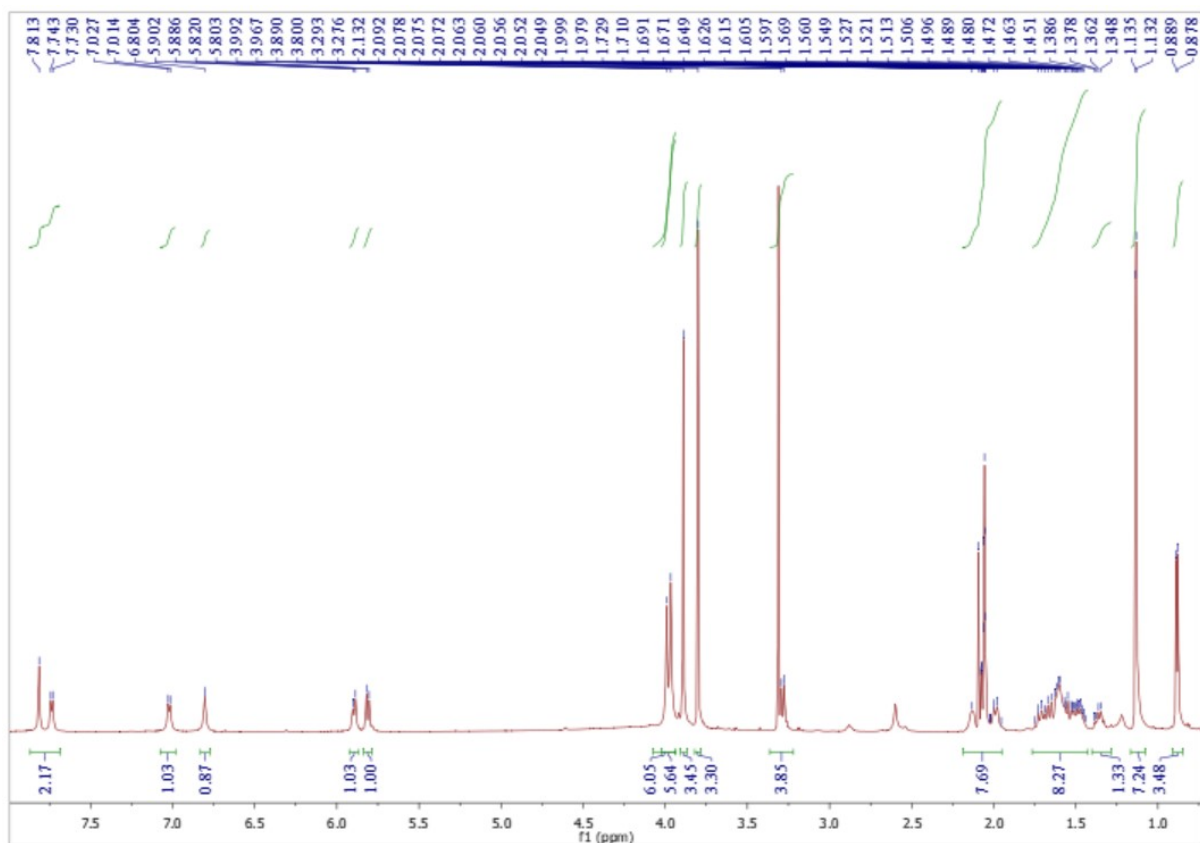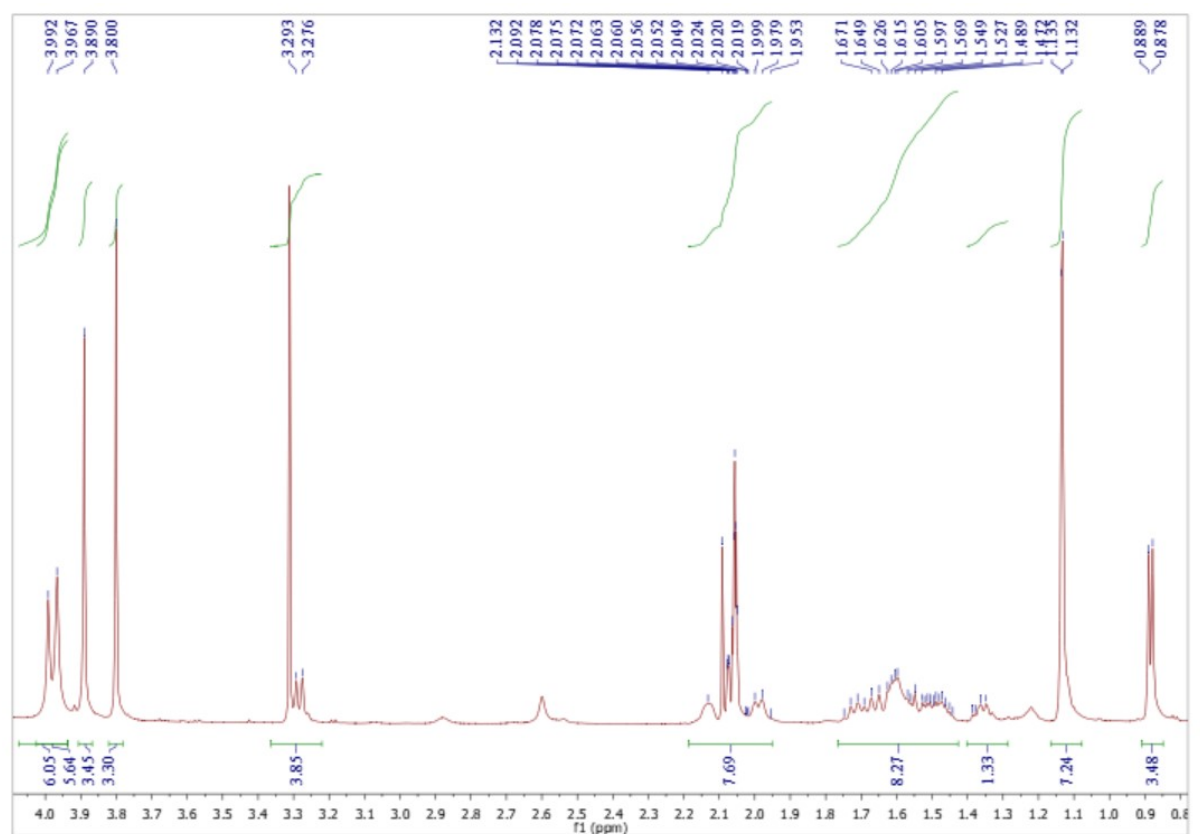

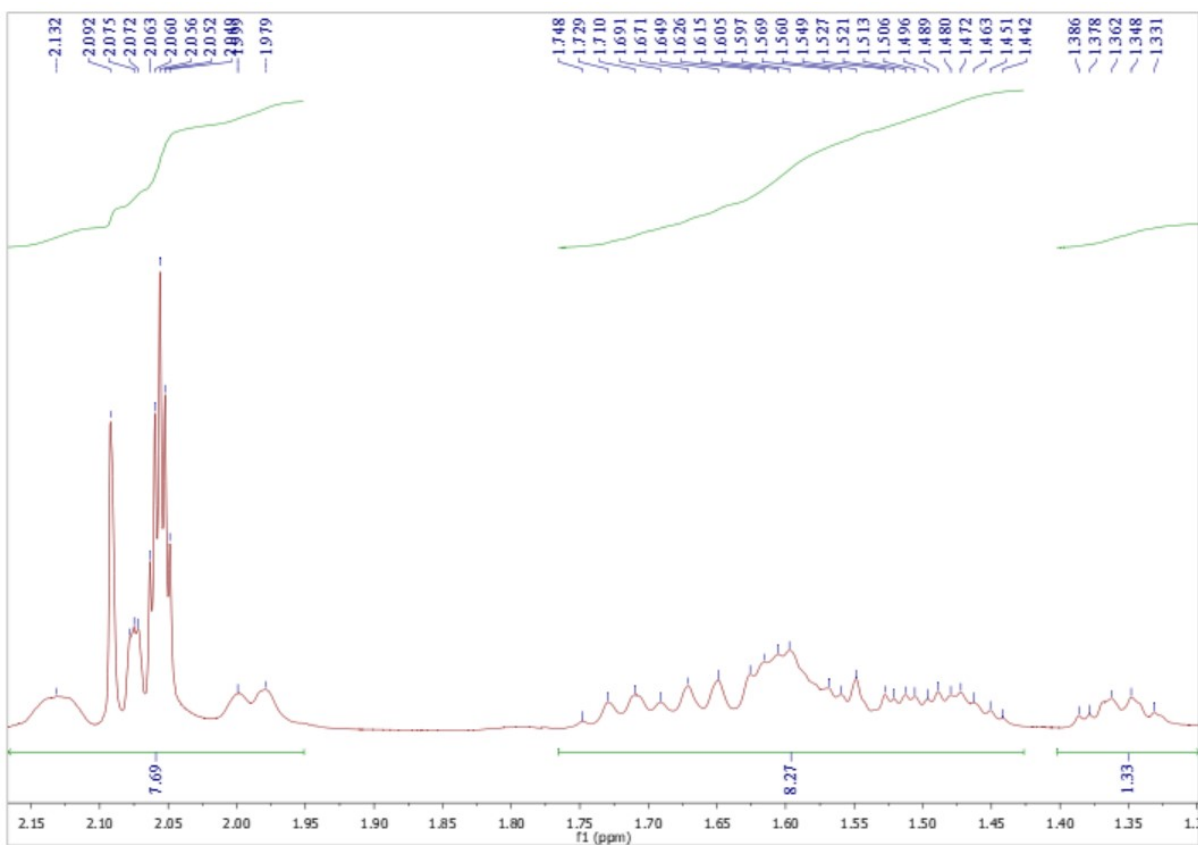

S2.  $^{13}\text{C}$  NMR (DEPT) (150 MHz, acetone- $d_6$ ) of compound **1**

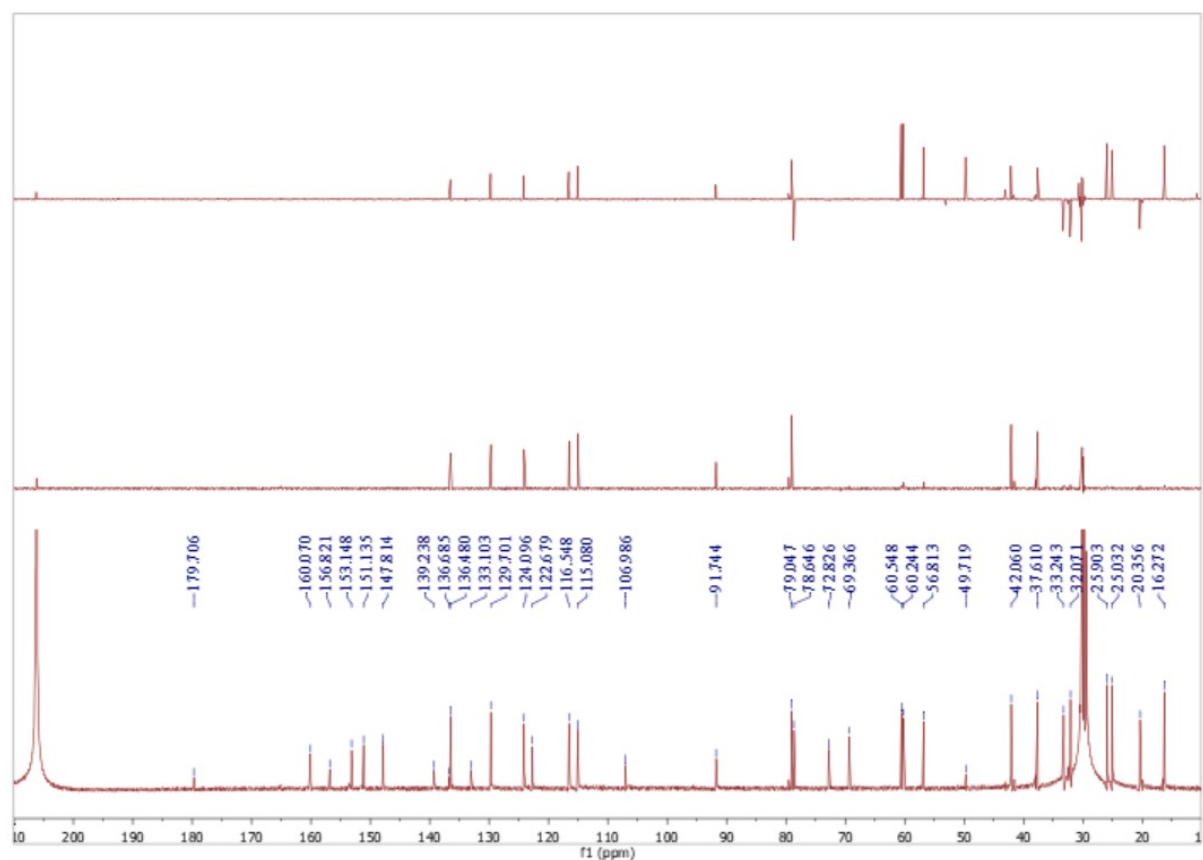

S3.  $^1\text{H}$ - $^1\text{H}$  COSY (600 MHz, acetone- $d_6$ ) of compound **1**

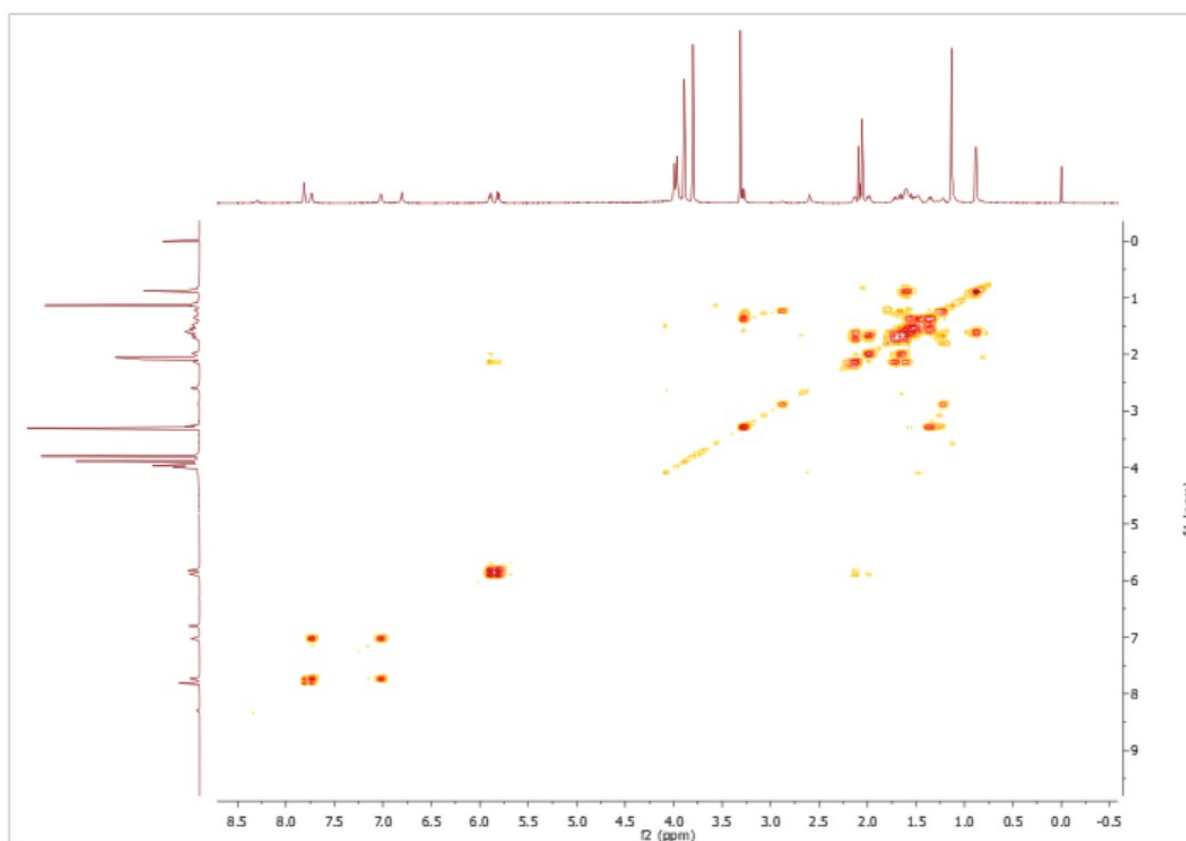

S4. HSQC (600 MHz, acetone- $d_6$ ) of compound **1**

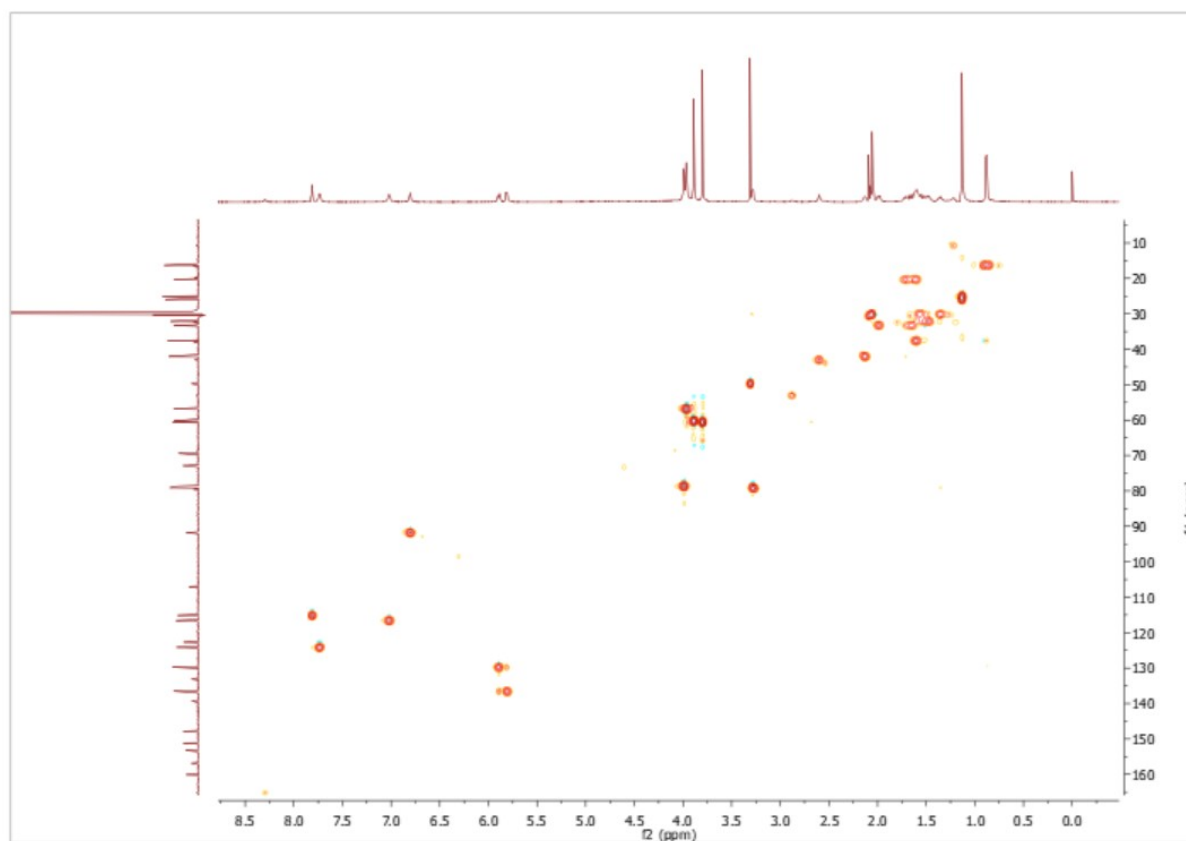



S5. HMBC (600 MHz, acetone-d<sub>6</sub>) of compound **1**

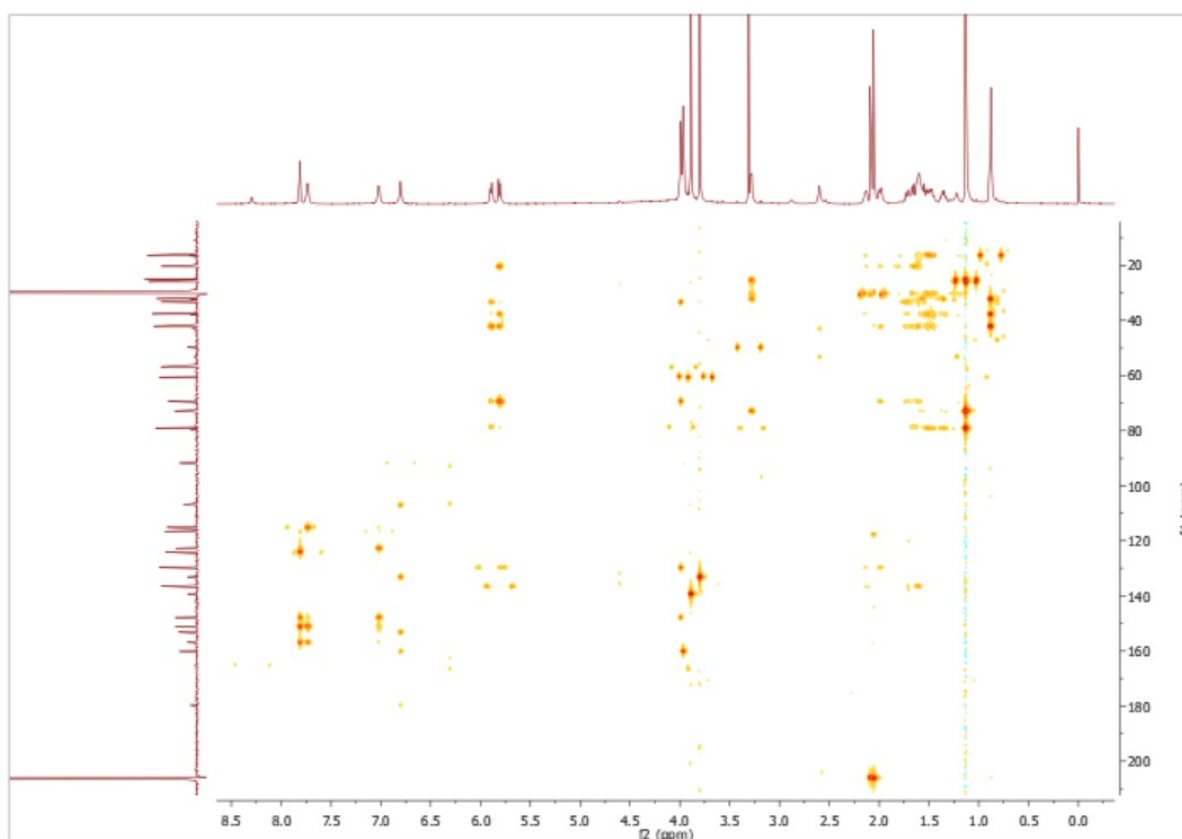

S6. ROESY (600 MHz, acetone-d<sub>6</sub>) of compound **1**

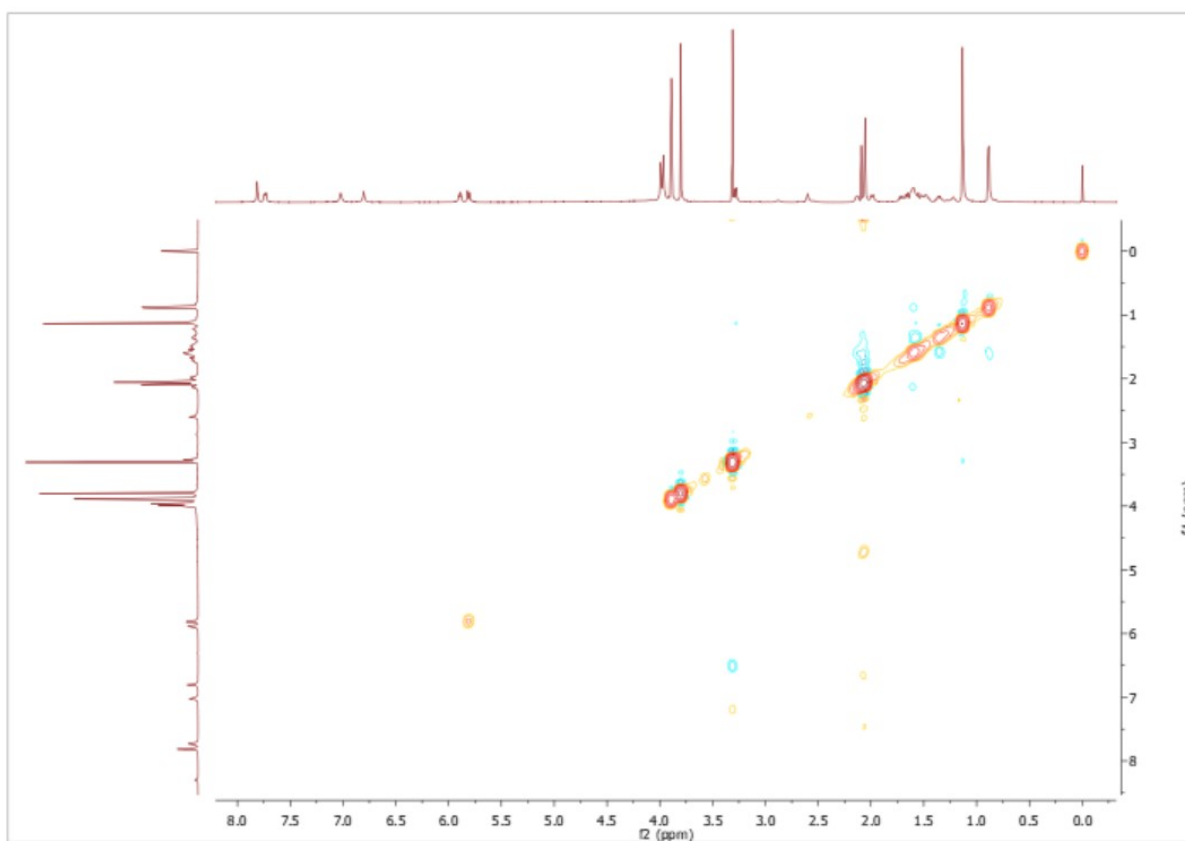

S7.  $[\alpha]_D$  spectrum of compound **1** in MeOH

**Rudolph Research Analytical**

This sample was measured on an Autopol VI, Serial #91058  
 Manufactured by Rudolph Research Analytical, Hackettstown, NJ, USA.

Measurement Date : Tuesday, 13-DEC-2022

Set Temperature : 20.0

Time Delay : Disabled

Delay between Measurement : Disabled

| <u>n</u>    | <u>Average</u>   | <u>Std.Dev.</u> | <u>% RSD</u>  | <u>Maximum</u> | <u>Minimum</u> |               |              |                     |              |  |
|-------------|------------------|-----------------|---------------|----------------|----------------|---------------|--------------|---------------------|--------------|--|
| 5           | 59.59            | 1.16            | 1.94          | 61.22          | 58.16          |               |              |                     |              |  |
| <u>S.No</u> | <u>Sample ID</u> | <u>Time</u>     | <u>Result</u> | <u>Scale</u>   | <u>OR °Arc</u> | <u>WLG.nm</u> | <u>Lg.mm</u> | <u>Conc.g/100ml</u> | <u>Temp.</u> |  |
| 1           | janh-7a          | 03:19:44 PM     | 61.22         | SR             | 0.060          | 589           | 100.00       | 0.098               | 20.2         |  |
| 2           | janh-7a          | 03:19:51 PM     | 60.20         | SR             | 0.059          | 589           | 100.00       | 0.098               | 20.2         |  |
| 3           | janh-7a          | 03:19:58 PM     | 59.18         | SR             | 0.058          | 589           | 100.00       | 0.098               | 20.2         |  |
| 4           | janh-7a          | 03:20:04 PM     | 59.18         | SR             | 0.058          | 589           | 100.00       | 0.098               | 20.1         |  |
| 5           | janh-7a          | 03:20:11 PM     | 58.16         | SR             | 0.057          | 589           | 100.00       | 0.098               | 20.1         |  |

S8. IR of compound **1**

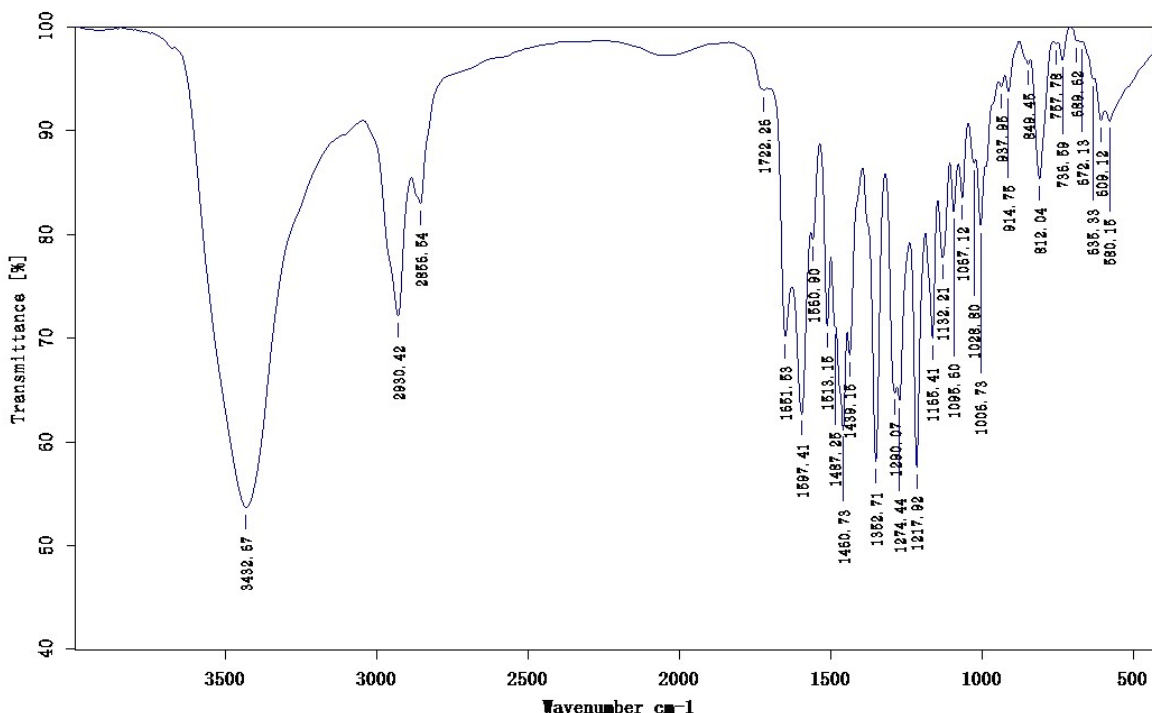

Sample Name: Janh-7a  
 Sample Form: KBr  
 Path of File: E:\data  
 Date of Measurement: 2023/1/14

Resolution: 4  
 Aperture Setting: 6 mm  
 Number of Background Scans: 16  
 Number of Sample Scans: 16

Beamsplitter Setting: KBr  
 Source Setting: MIR  
 Instrument Type: BRUKER VERTEX 70  
 Soft Version: OPUS 8.1

S9. ECD and UV of compound 1

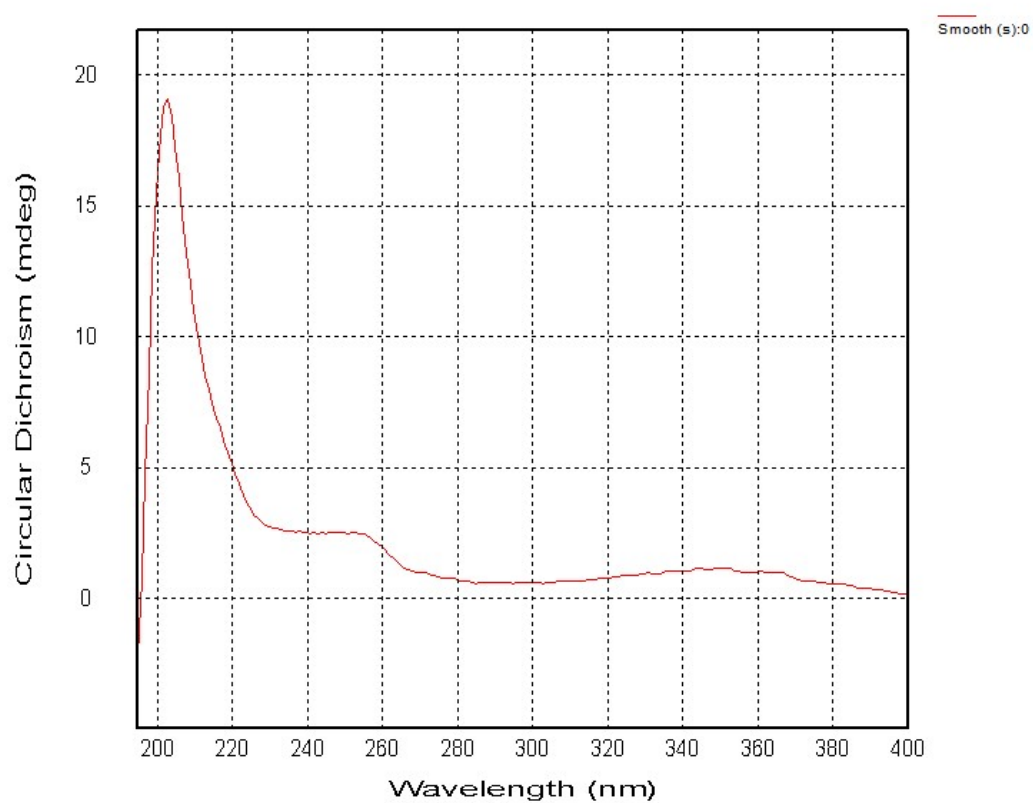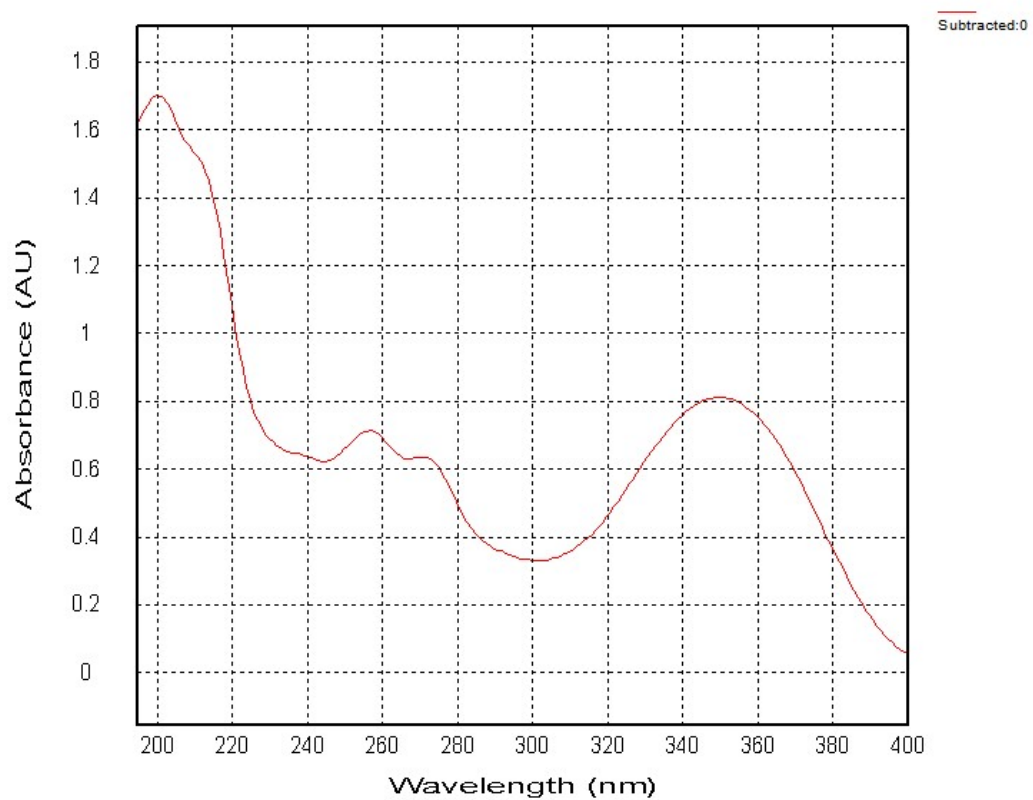

# S10. HRESIMS of compound 1

| Elmt | Val. | Min | Max | Elmt | Val. | Min | Max | Use Adduct |
|------|------|-----|-----|------|------|-----|-----|------------|
| H    | 1    | 0   | 300 | O    | 2    | 0   | 12  | H          |
| C    | 4    | 0   | 150 | 15N  | 3    | 0   | 0   | Na         |
| N    | 3    | 0   | 1   |      |      |     |     |            |

Error Margin (ppm): 50  
 HC Ratio: unlimited  
 Max Isotopes: all  
 MSn Iso RI (%): 75.00

DBE Range: -2.0 - 1000.0  
 Apply N Rule: yes  
 Isotope RI (%): 1.00  
 MSn Logic Mode: AND

Electron Ions: both  
 Use MSn Info: no  
 Isotope Res: 10000  
 Max Results: 500

Event#: 1 MS(E+) Ret. Time : 11.310 Scan#: 1570

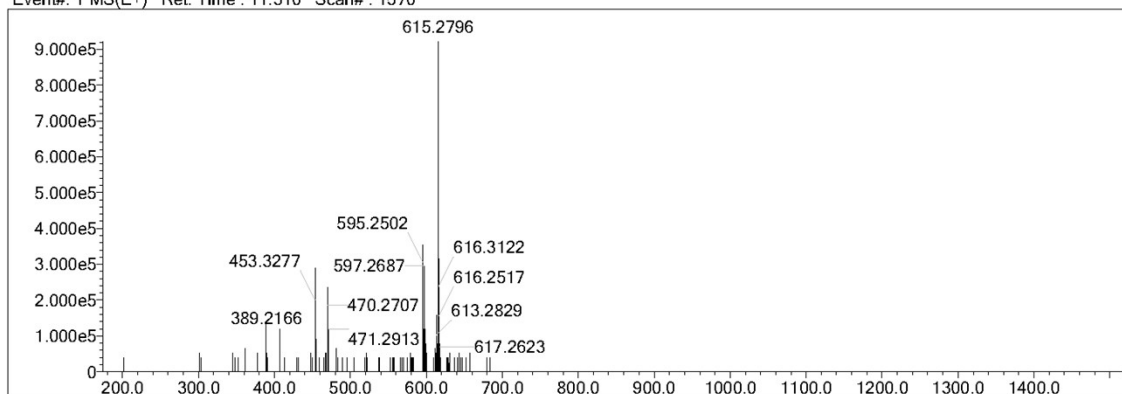

Measured region for 615.2796 m/z

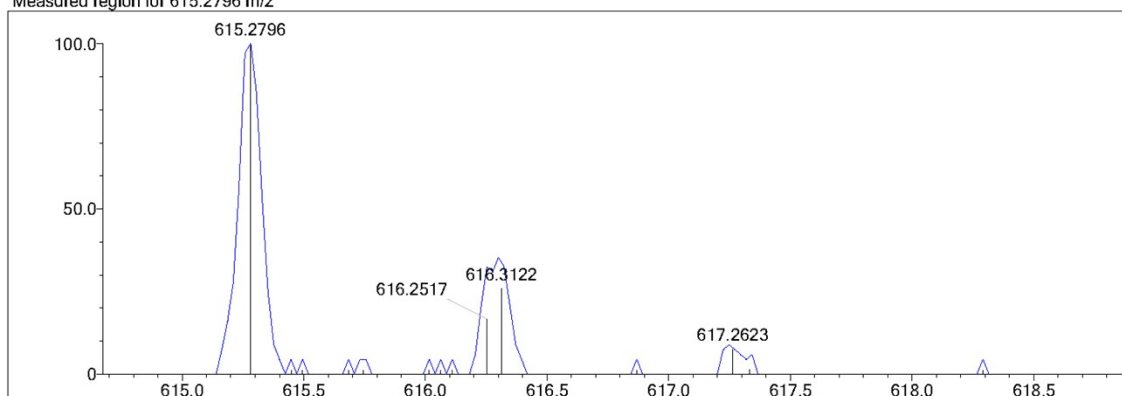

C33 H42 O11 [M+H]<sup>+</sup> : Predicted region for 615.2800 m/z

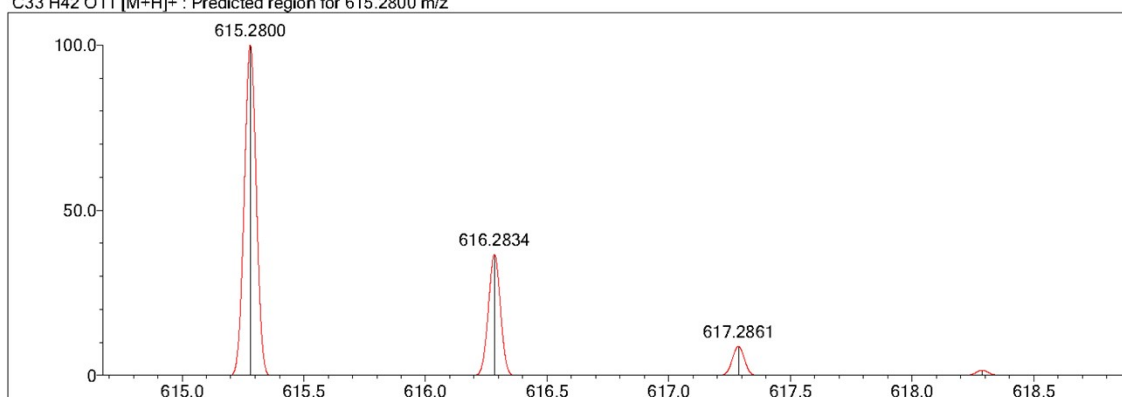

| Rank | Score | Formula (M) | Ion                | Meas. m/z | Pred. m/z | Df. (mDa) | Df. (ppm) | Iso   | DBE  |
|------|-------|-------------|--------------------|-----------|-----------|-----------|-----------|-------|------|
| 2    | 39.32 | C33 H42 O11 | [M+H] <sup>+</sup> | 615.2796  | 615.2800  | -0.4      | -0.65     | 39.32 | 13.0 |

S11. <sup>1</sup>H NMR (600 MHz, acetone-d<sub>6</sub>) of compound 2

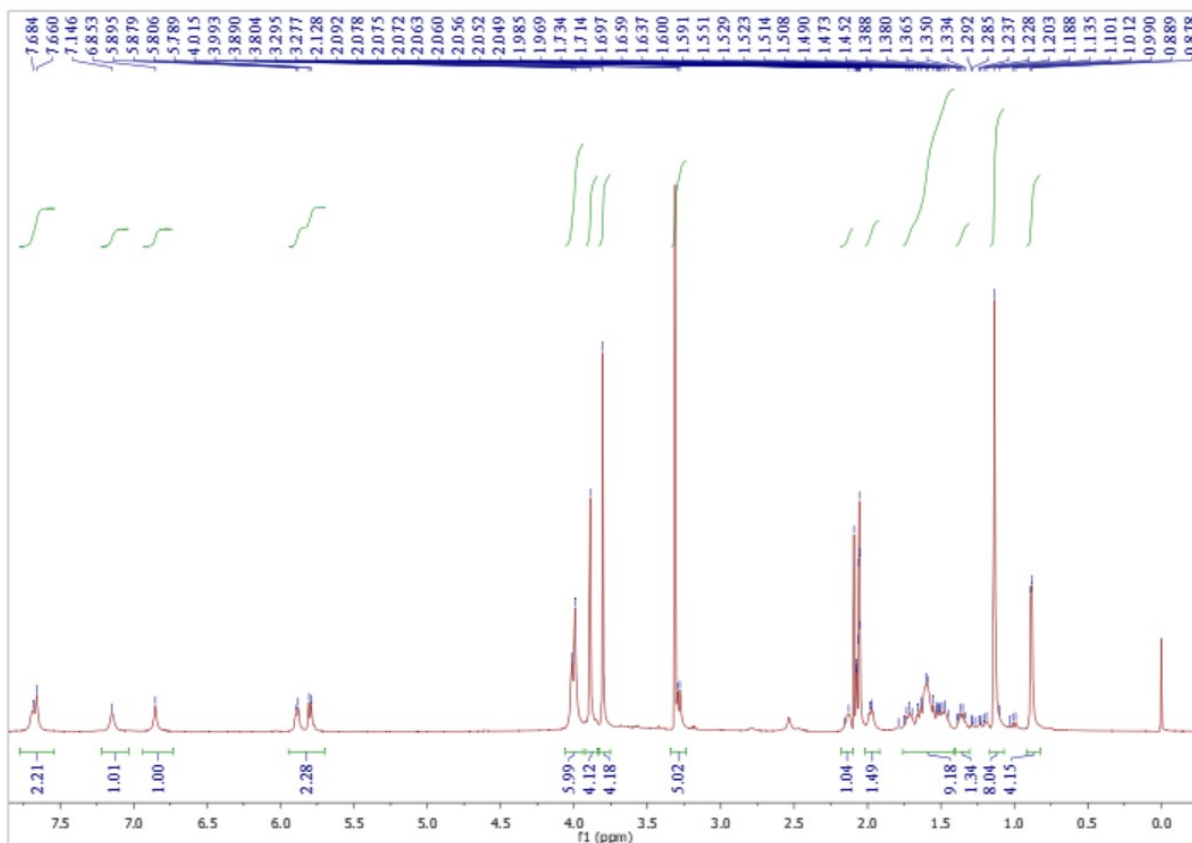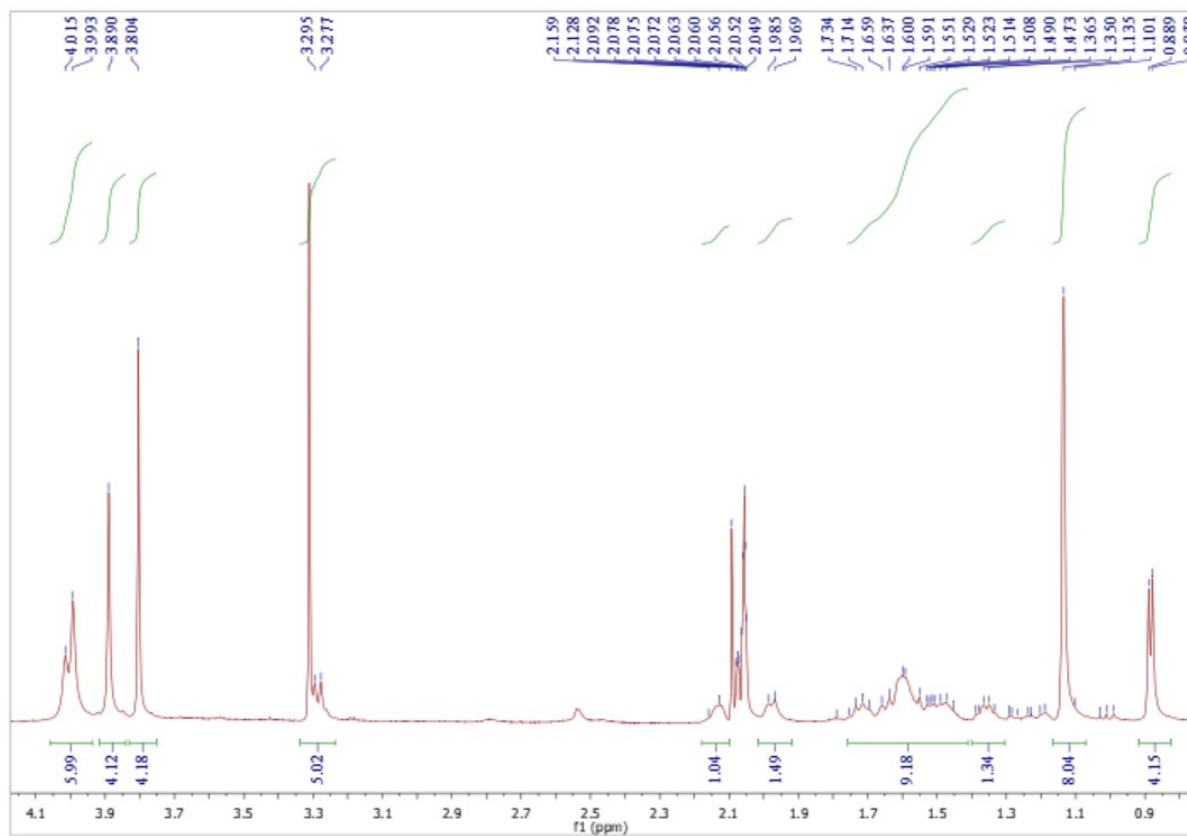

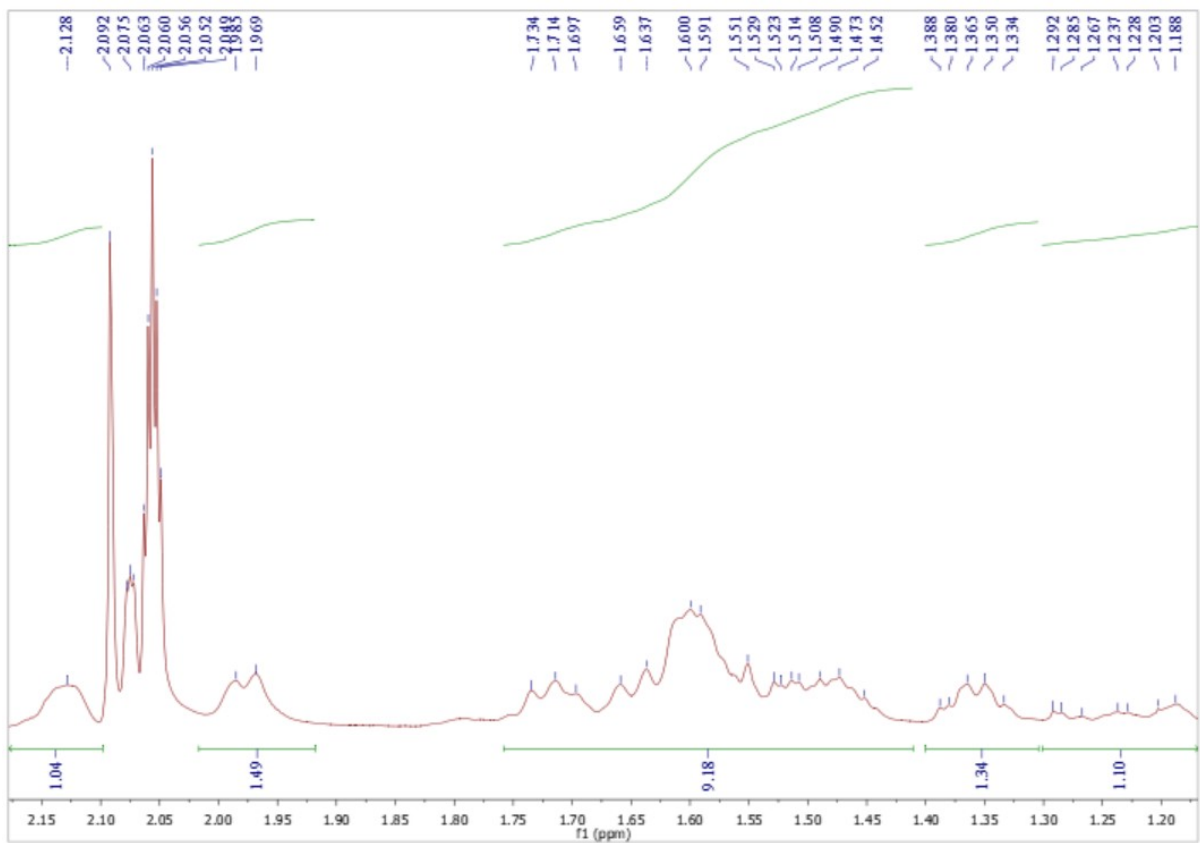

S12.  $^{13}\text{C}$  NMR (DEPT) (150 MHz, acetone- $d_6$ ) of compound **2**

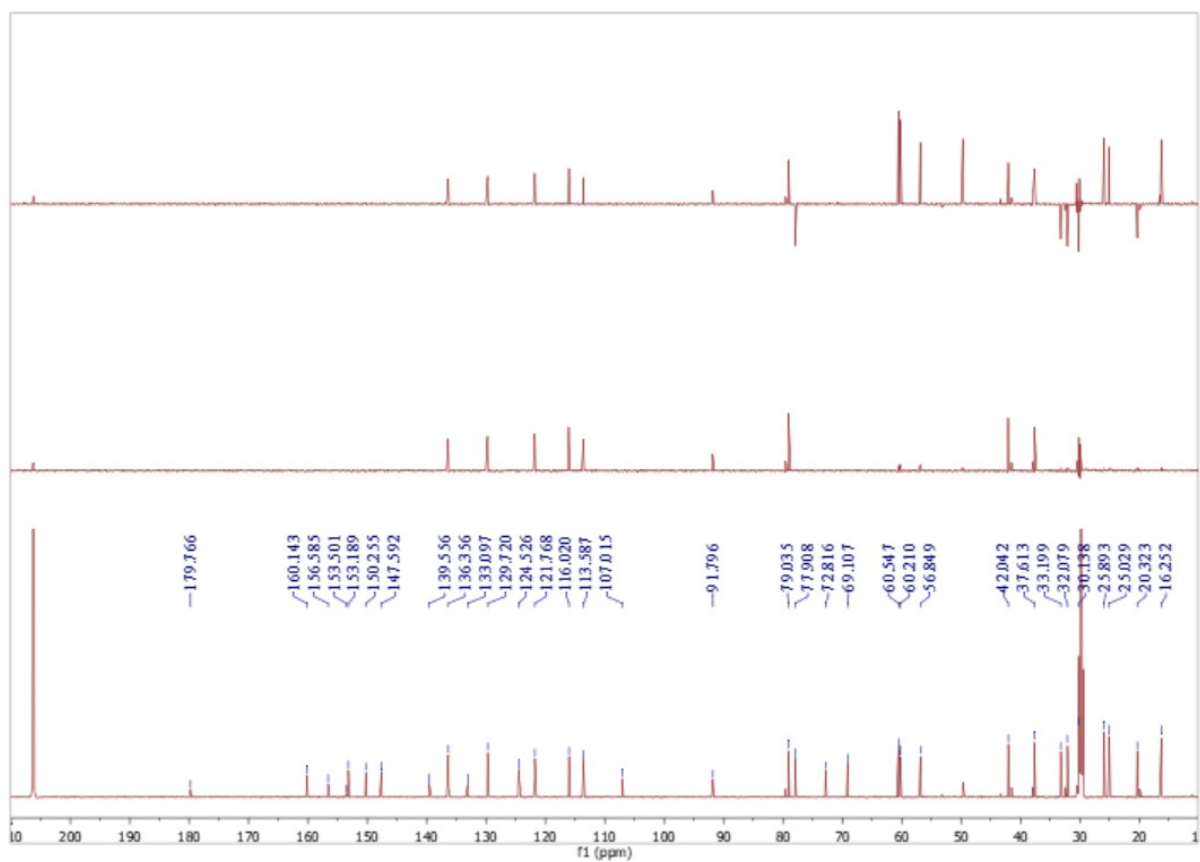

S13.  $^1\text{H}$ - $^1\text{H}$  COSY (600 MHz, acetone- $d_6$ ) of compound **2**

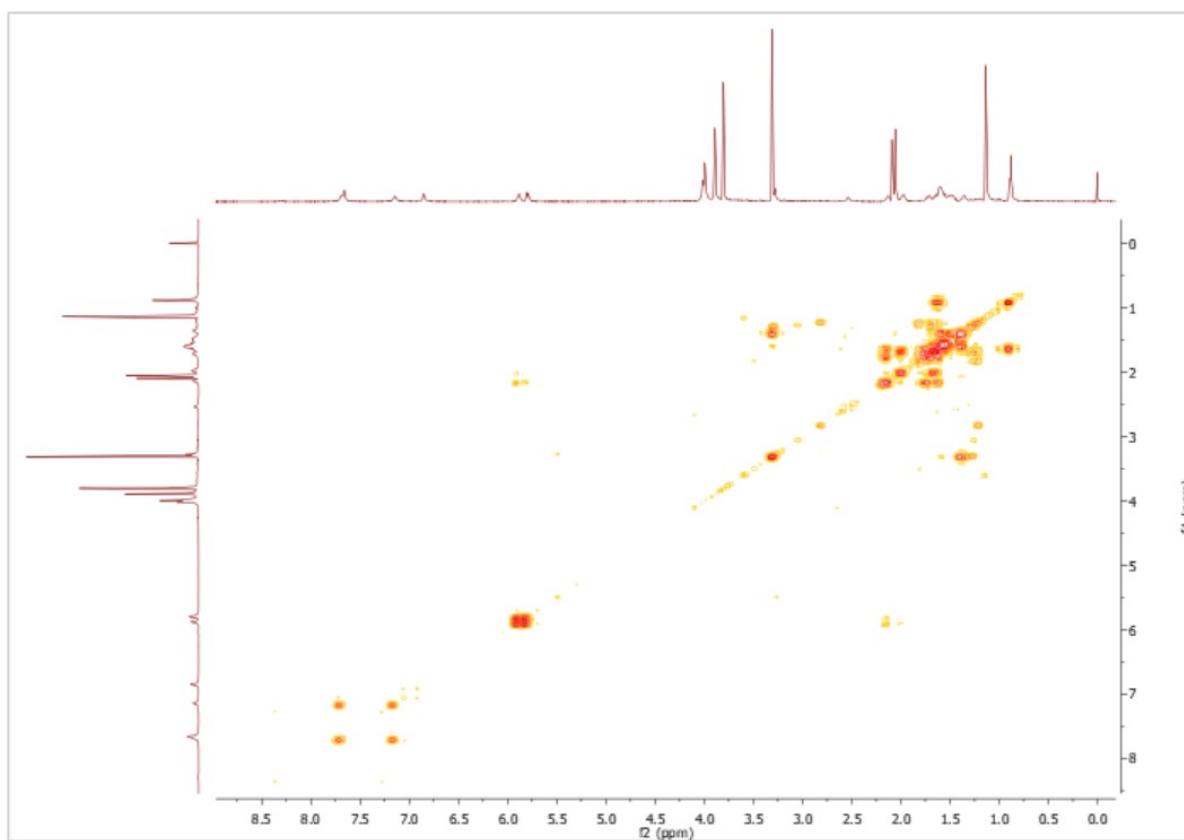

S14. HSQC (600 MHz, acetone- $d_6$ ) of compound **2**

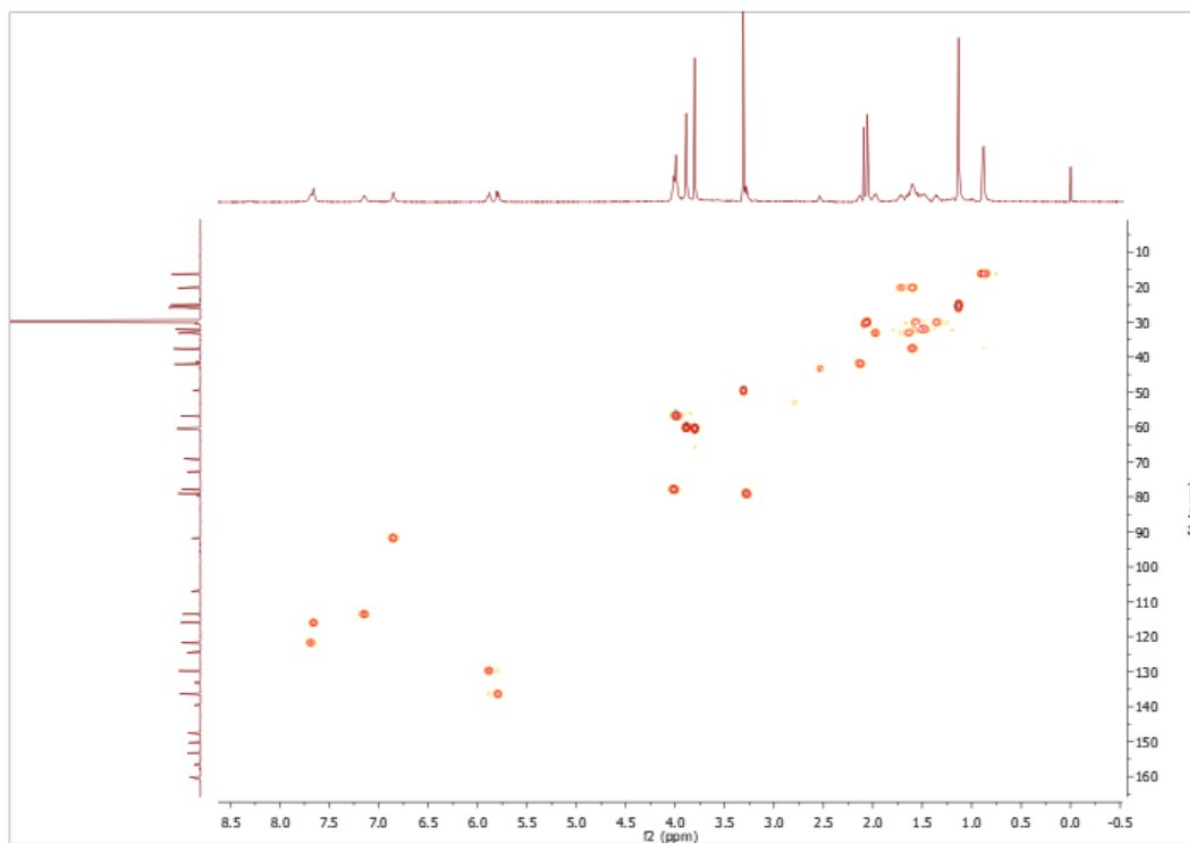

S15. HMBC (600 MHz, acetone-d<sub>6</sub>) of compound 2

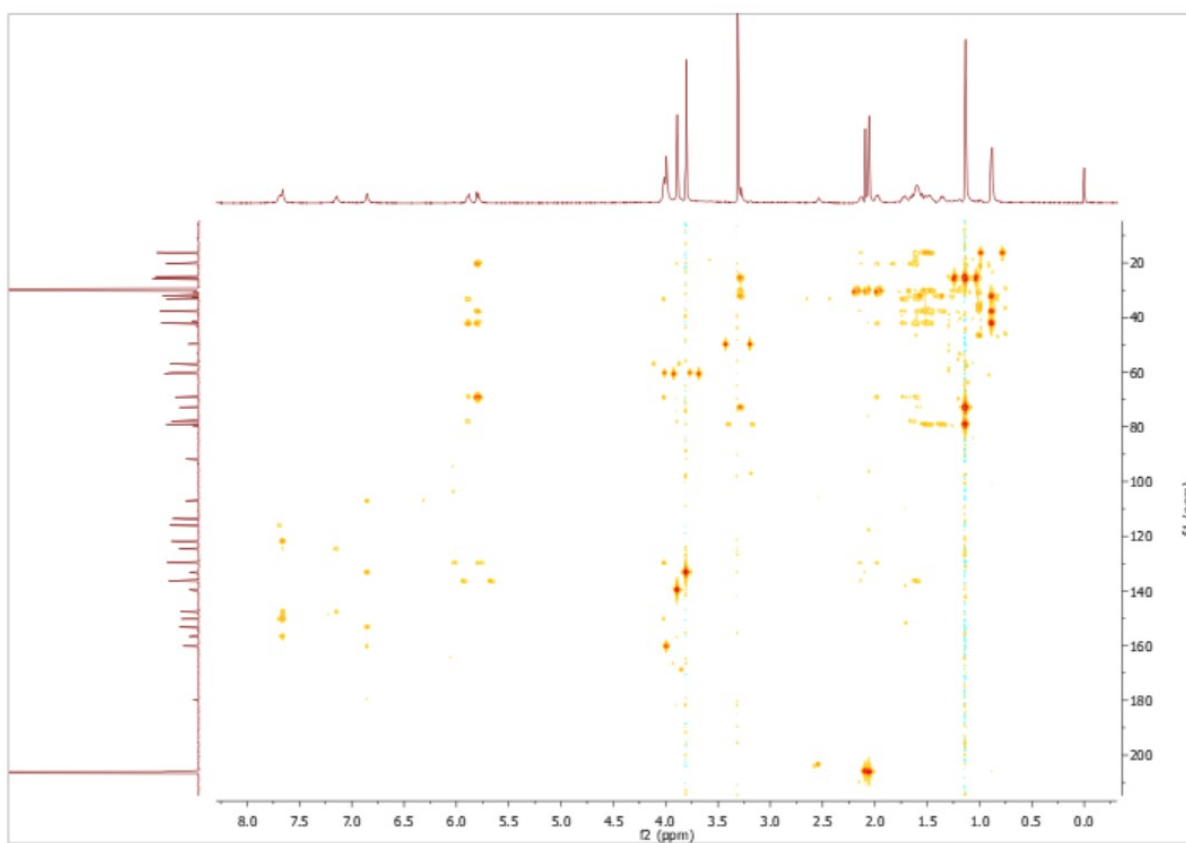

S16. ROESY (600 MHz, acetone-d<sub>6</sub>) of compound 2

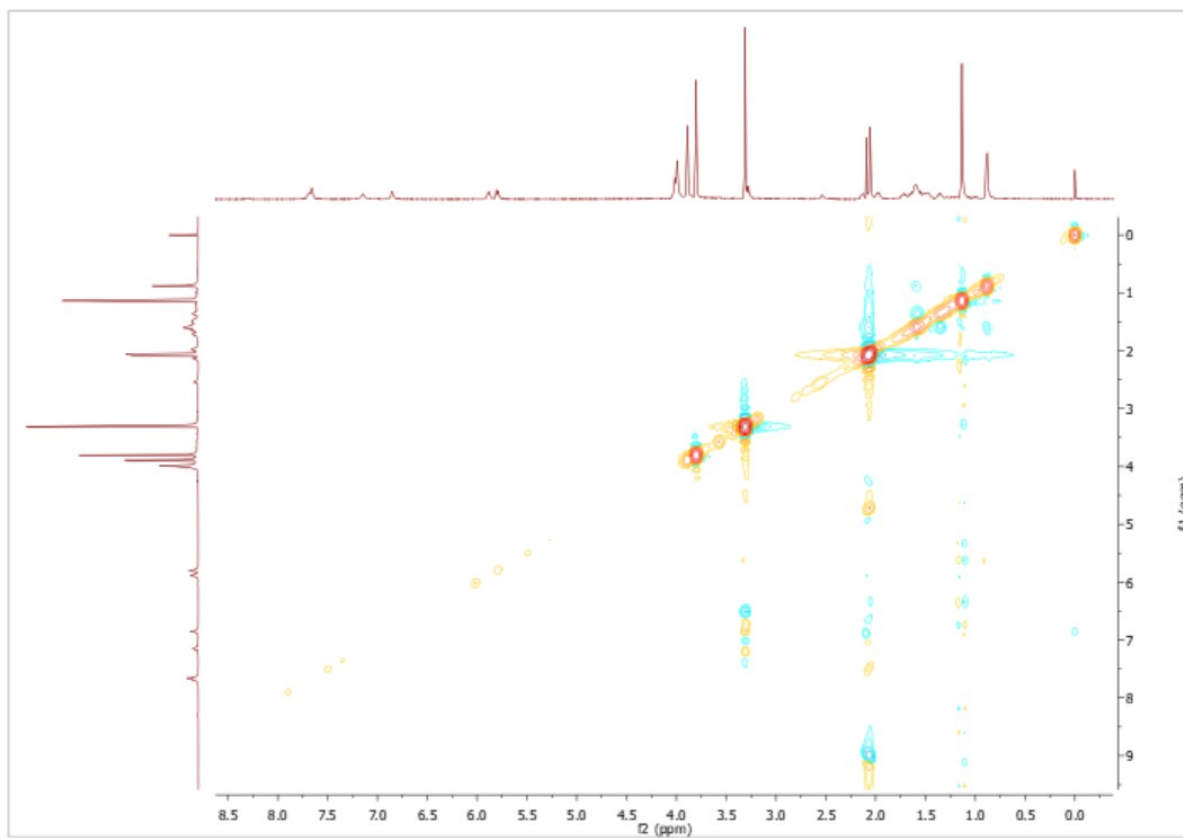



S17.  $[\alpha]_D$  spectrum of compound 2 in MeOH

**Rudolph Research Analytical**

This sample was measured on an Autopol VI, Serial #91058  
 Manufactured by Rudolph Research Analytical, Hackettstown, NJ, USA.

Measurement Date : Tuesday, 13-DEC-2022

Set Temperature : 20.0

Time Delay : Disabled

Delay between Measurement : Disabled

| <u>n</u>    | <u>Average</u>   | <u>Std.Dev.</u> | <u>% RSD</u>  | <u>Maximum</u> | <u>Minimum</u> |               |              |                     |              |  |
|-------------|------------------|-----------------|---------------|----------------|----------------|---------------|--------------|---------------------|--------------|--|
| 5           | 52.09            | 1.23            | 2.36          | 52.99          | 50.75          |               |              |                     |              |  |
| <u>S.No</u> | <u>Sample ID</u> | <u>Time</u>     | <u>Result</u> | <u>Scale</u>   | <u>OR °Arc</u> | <u>WLG.nm</u> | <u>Lg.mm</u> | <u>Conc.g/100ml</u> | <u>Temp.</u> |  |
| 1           | janh-7b          | 03:25:24 PM     | 52.99         | SR             | 0.071          | 589           | 100.00       | 0.134               | 20.2         |  |
| 2           | janh-7b          | 03:25:31 PM     | 52.99         | SR             | 0.071          | 589           | 100.00       | 0.134               | 20.1         |  |
| 3           | janh-7b          | 03:25:37 PM     | 52.99         | SR             | 0.071          | 589           | 100.00       | 0.134               | 20.1         |  |
| 4           | janh-7b          | 03:25:44 PM     | 50.75         | SR             | 0.068          | 589           | 100.00       | 0.134               | 20.1         |  |
| 5           | janh-7b          | 03:25:51 PM     | 50.75         | SR             | 0.068          | 589           | 100.00       | 0.134               | 20.0         |  |

S18. IR of compound 2

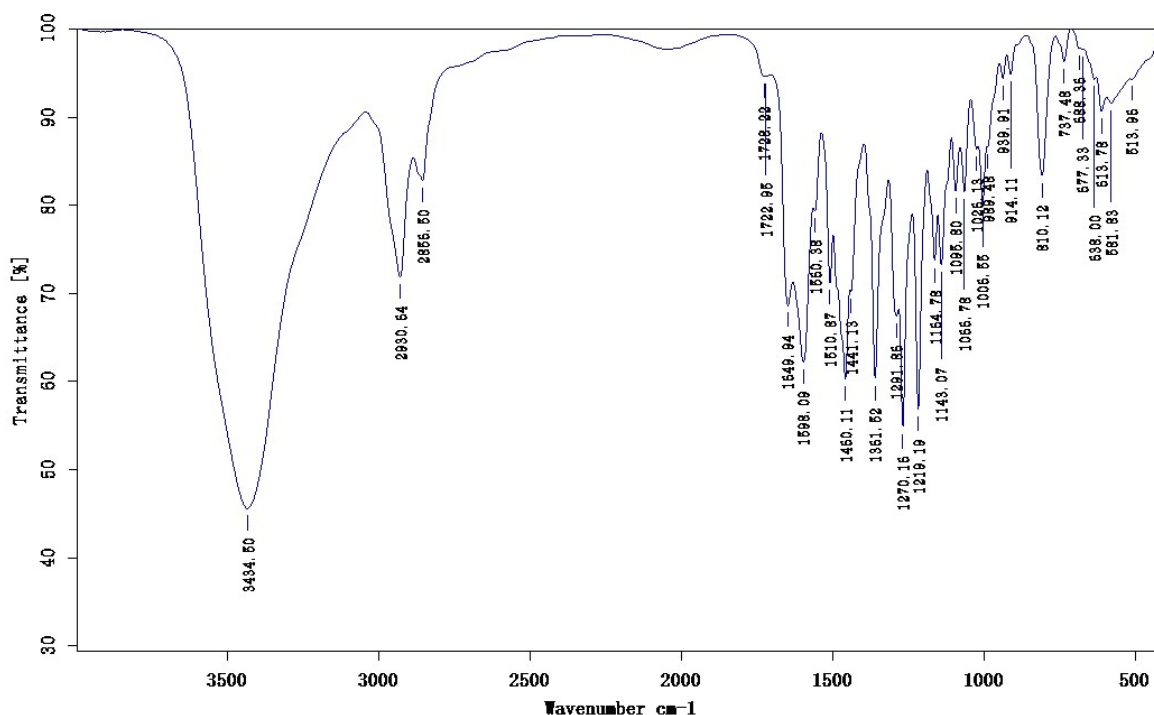

|                                |                                |                                   |
|--------------------------------|--------------------------------|-----------------------------------|
| Sample Name: Janh-7b           | Resolution: 4                  | Beamsplitter Setting: KBr         |
| Sample Form: KBr               | Aperture Setting: 6 mm         | Source Setting: MIR               |
| Path of File: E:\data          | Number of Background Scans: 16 | Instrument Type: BRUKER VERTEX 70 |
| Date of Measurement: 2023/1/15 | Number of Sample Scans: 16     | Soft Version: QPUS.1              |

S19. ECD and UV of compound 2

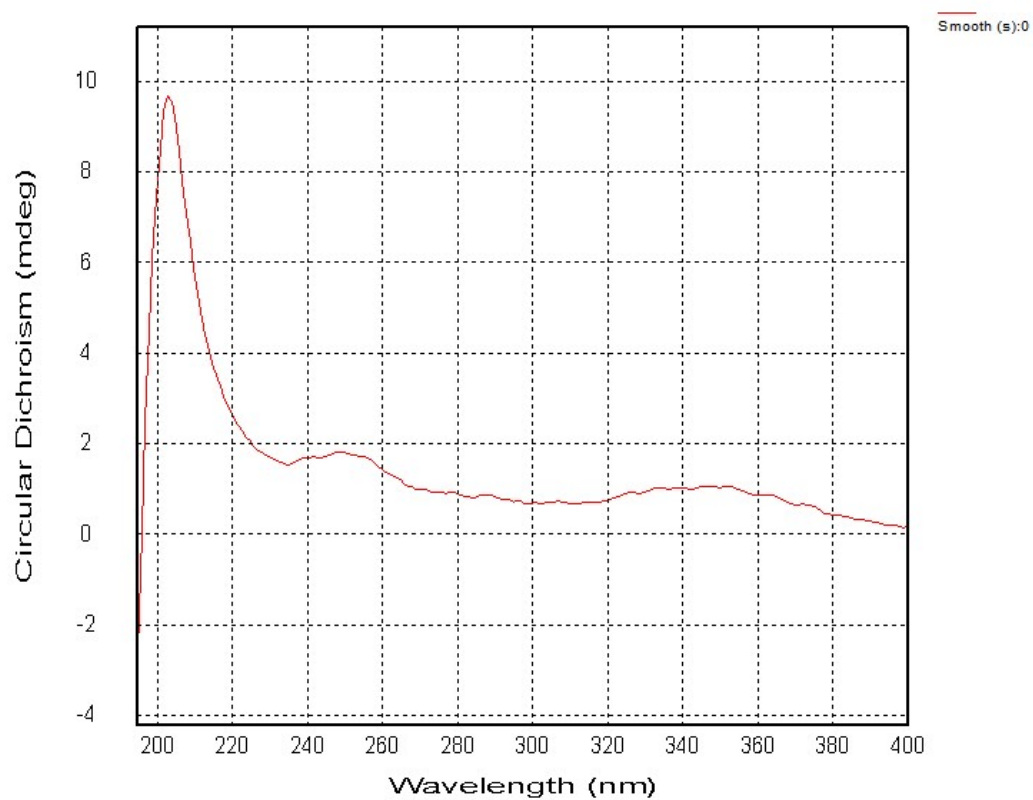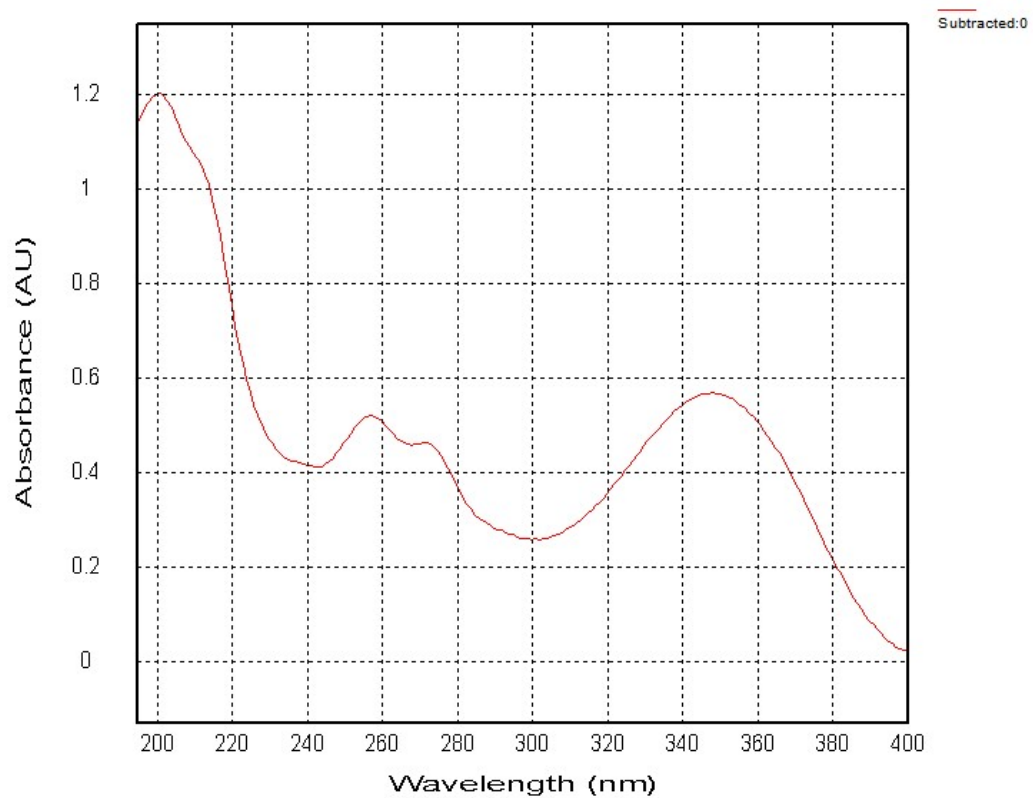

## S20. HRESIMS of compound 2

| Elmt | Val. | Min | Max | Elmt | Val. | Min | Max | Use Adduct |
|------|------|-----|-----|------|------|-----|-----|------------|
| H    | 1    | 0   | 300 | O    | 2    | 0   | 12  | H          |
| C    | 4    | 0   | 150 | 15N  | 3    | 0   | 0   | Na         |
| N    | 3    | 0   | 1   |      |      |     |     |            |

Error Margin (ppm): 50

HC Ratio: unlimited

Max Isotopes: all

MSn Iso RI (%): 75.00

DBE Range: -2.0 - 1000.0

Apply N Rule: yes

Isotope RI (%): 1.00

MSn Logic Mode: AND

Electron Ions: both

Use MSn Info: no

Isotope Res: 10000

Max Results: 500

Event#: 1 MS(E+) Ret. Time : 11.337 Scan# : 1574

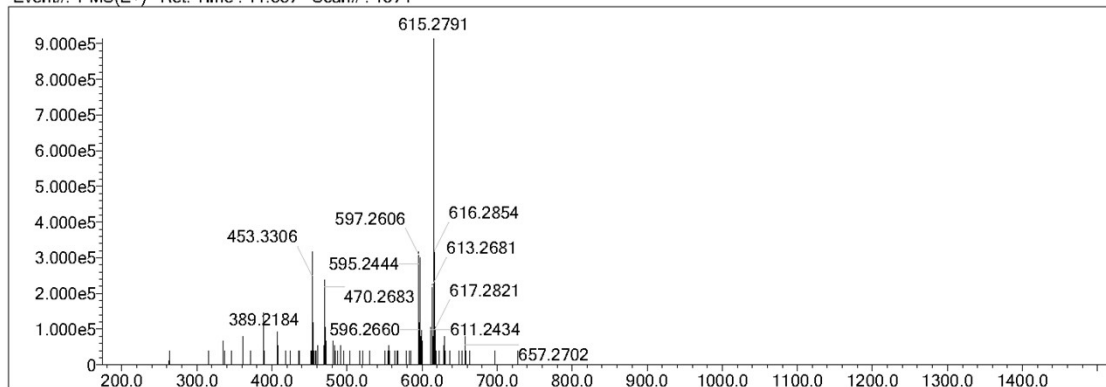

Measured region for 615.2791 m/z

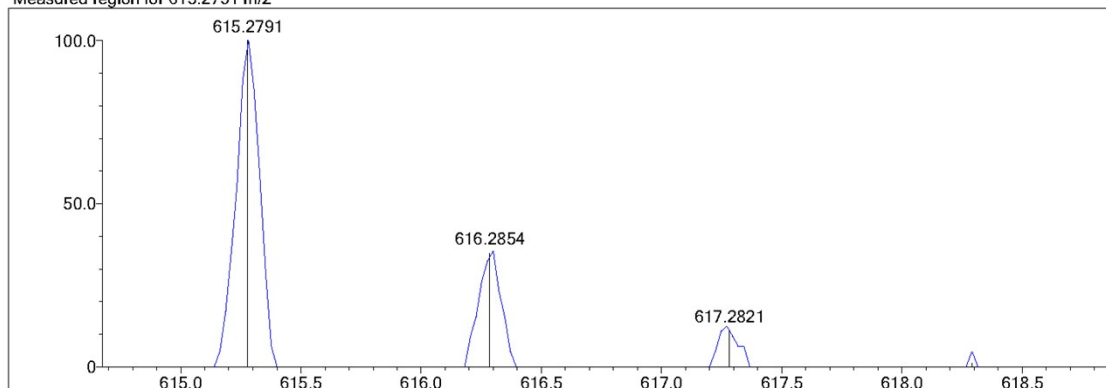

C33 H42 O11 [M+H]<sup>+</sup> : Predicted region for 615.2800 m/z

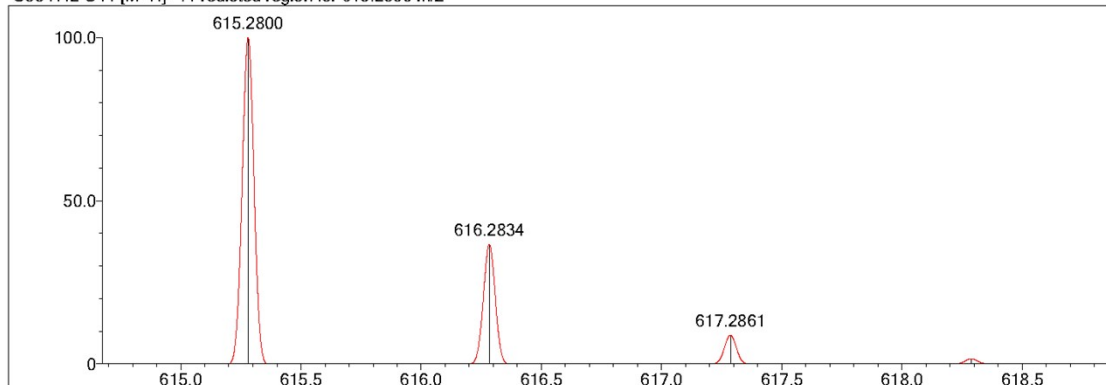

| Rank | Score | Formula (M) | Ion                | Meas. m/z | Pred. m/z | Df. (mDa) | Df. (ppm) | Iso   | DBE  |
|------|-------|-------------|--------------------|-----------|-----------|-----------|-----------|-------|------|
| 1    | 79.98 | C33 H42 O11 | [M+H] <sup>+</sup> | 615.2791  | 615.2800  | -0.9      | -1.46     | 80.91 | 13.0 |

S21. <sup>1</sup>H NMR (600 MHz, CD<sub>3</sub>OD) of compound 3

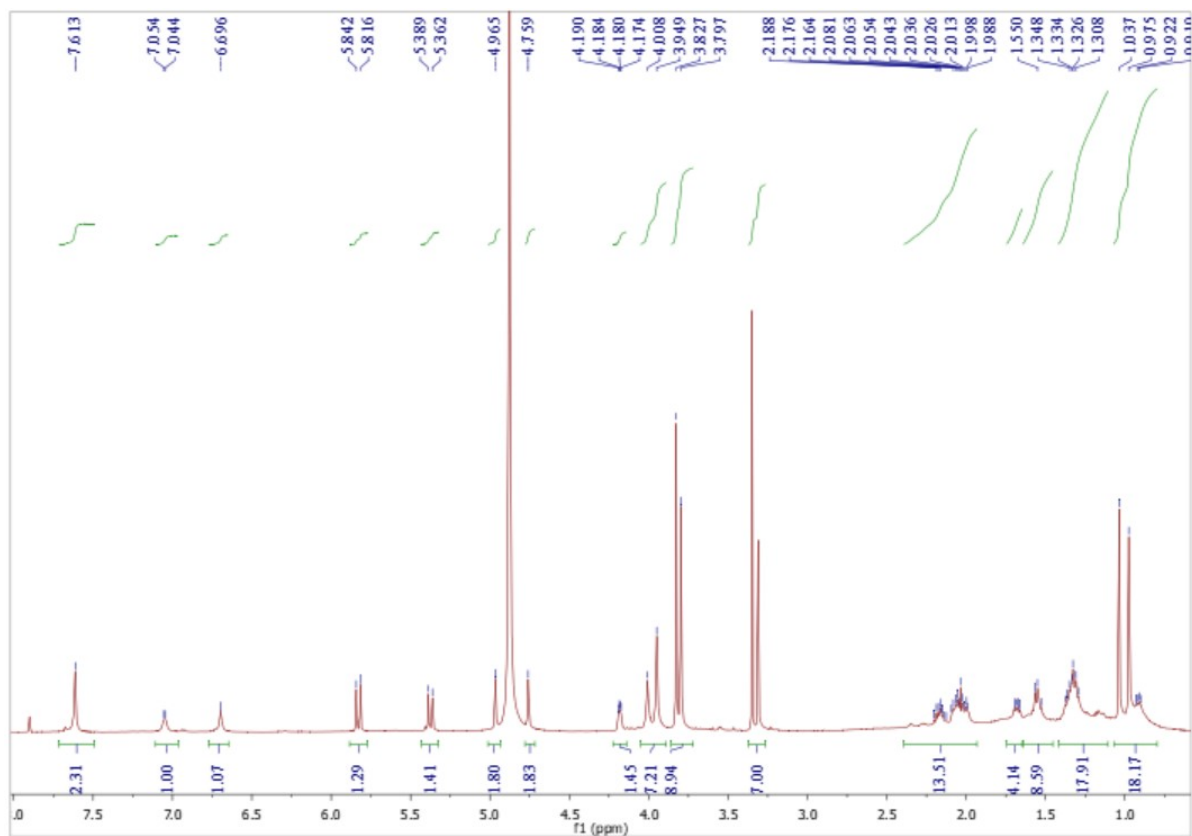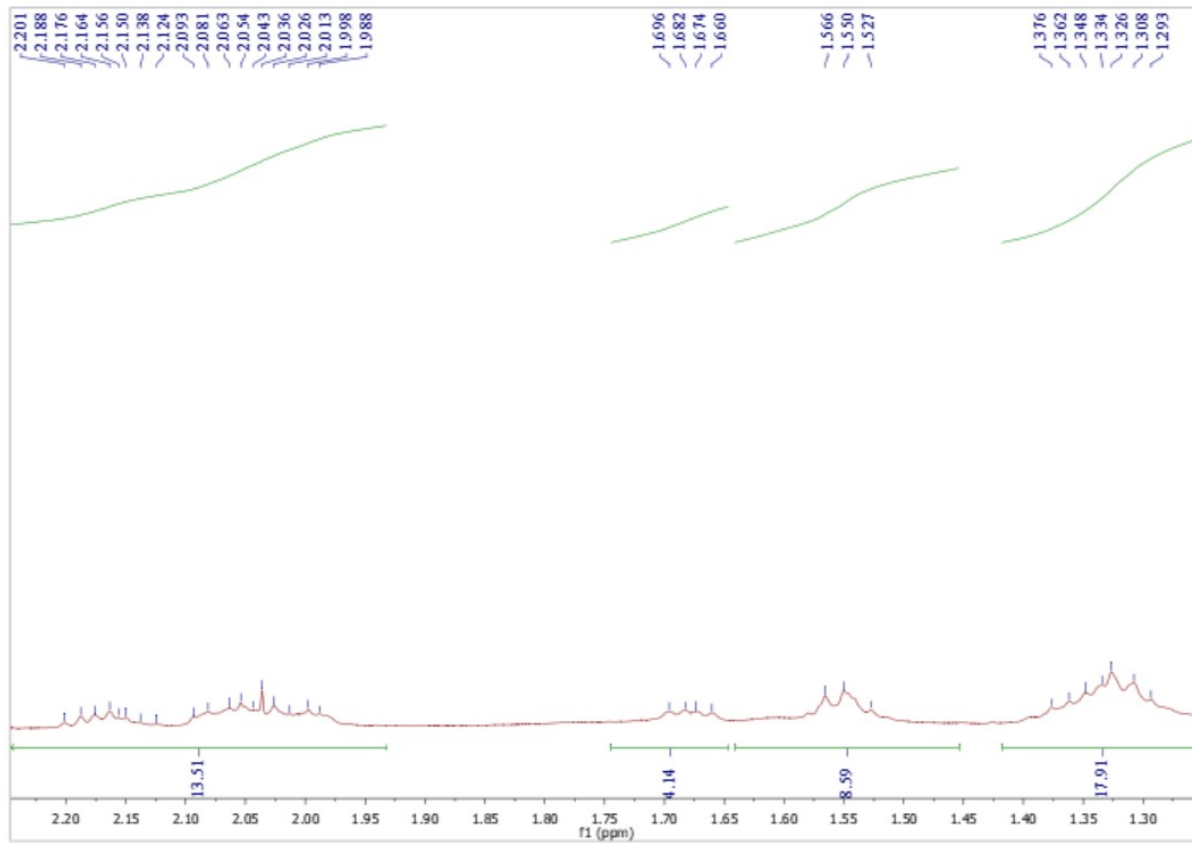

S22.  $^{13}\text{C}$  NMR (DEPT) (150 MHz,  $\text{CD}_3\text{OD}$ ) of compound **3**

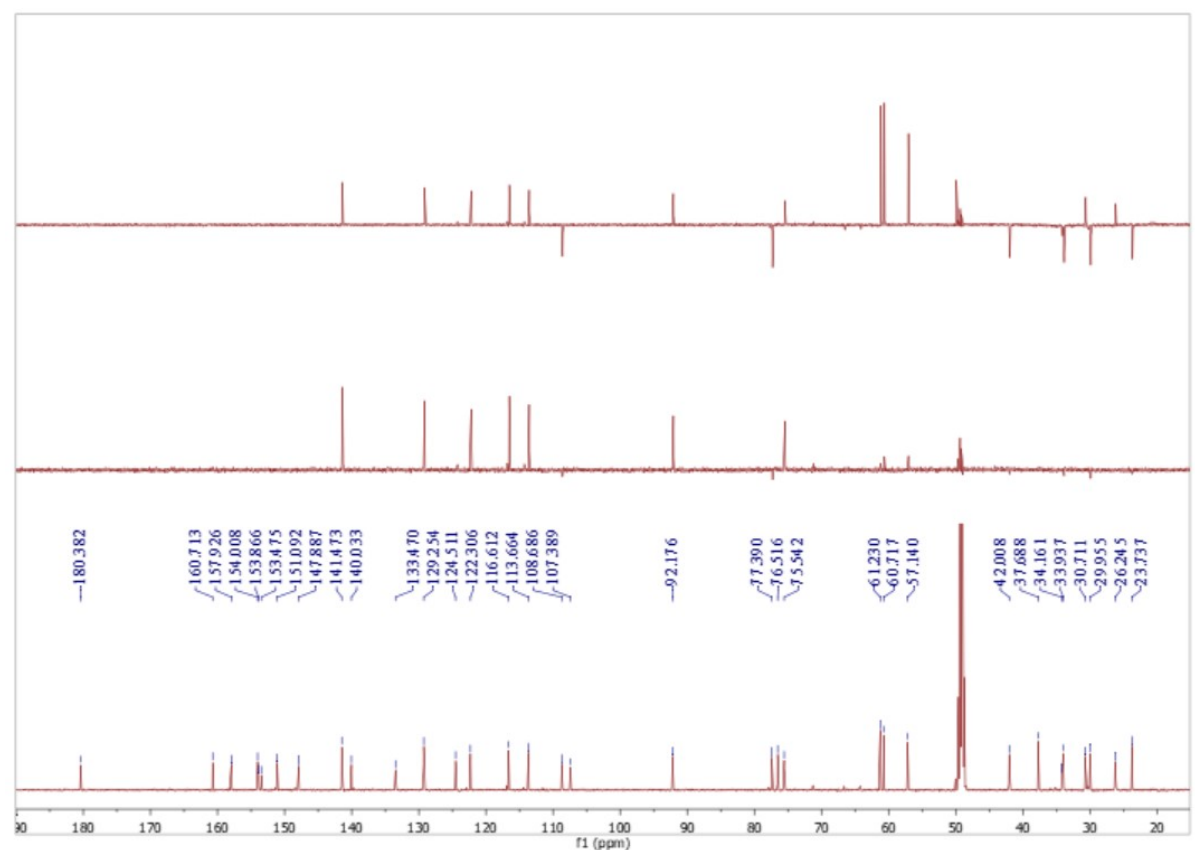

S23.  $^1\text{H}$ - $^1\text{H}$  COSY (600 MHz,  $\text{CD}_3\text{OD}$ ) of compound **3**

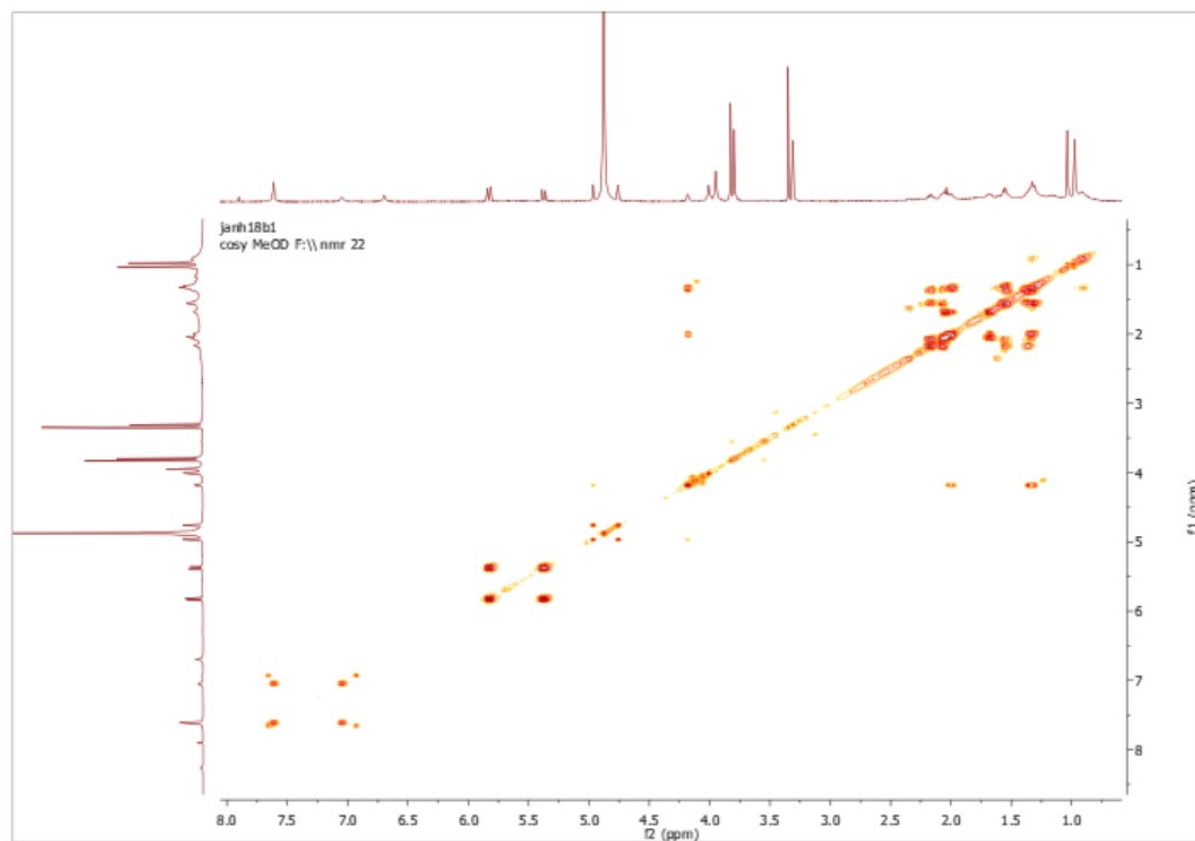

S24. HSQC (600 MHz, CD<sub>3</sub>OD) of compound **3**

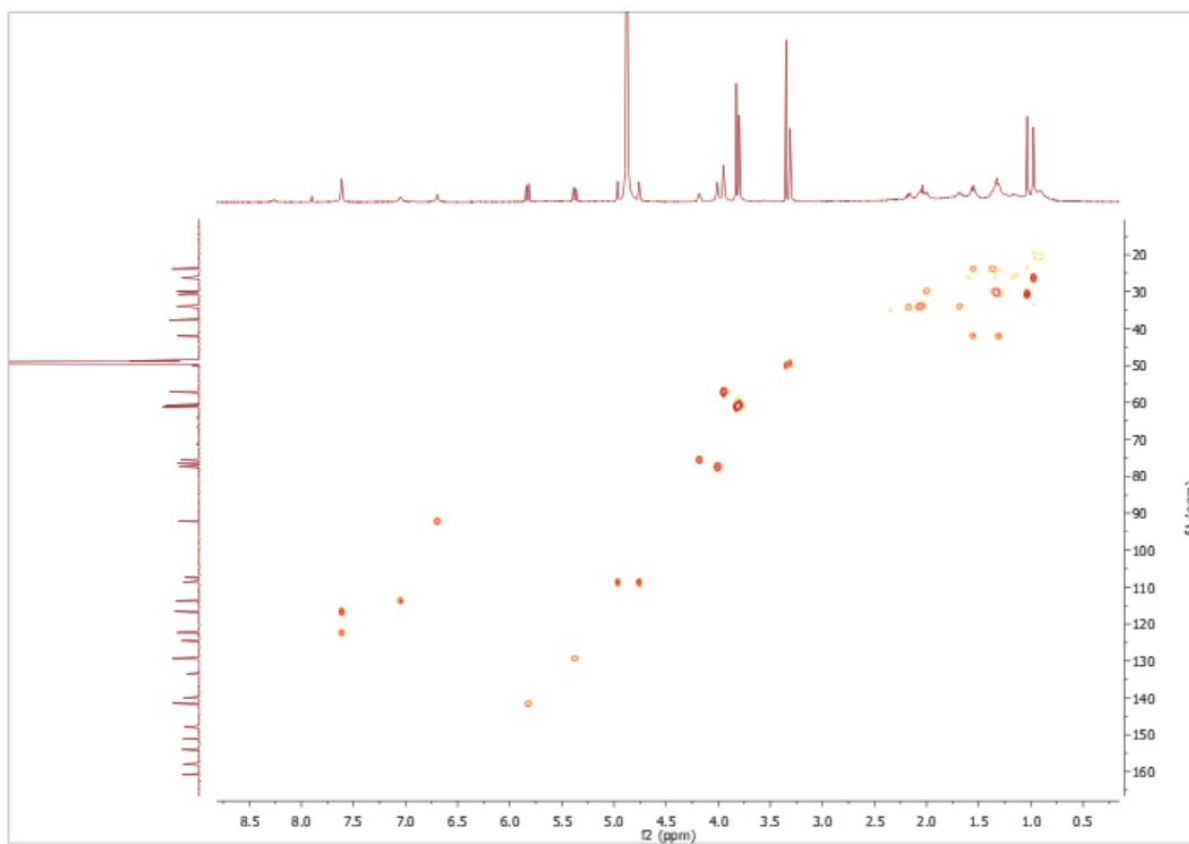

S25. HMBC (600 MHz, CD<sub>3</sub>OD) of compound **3**

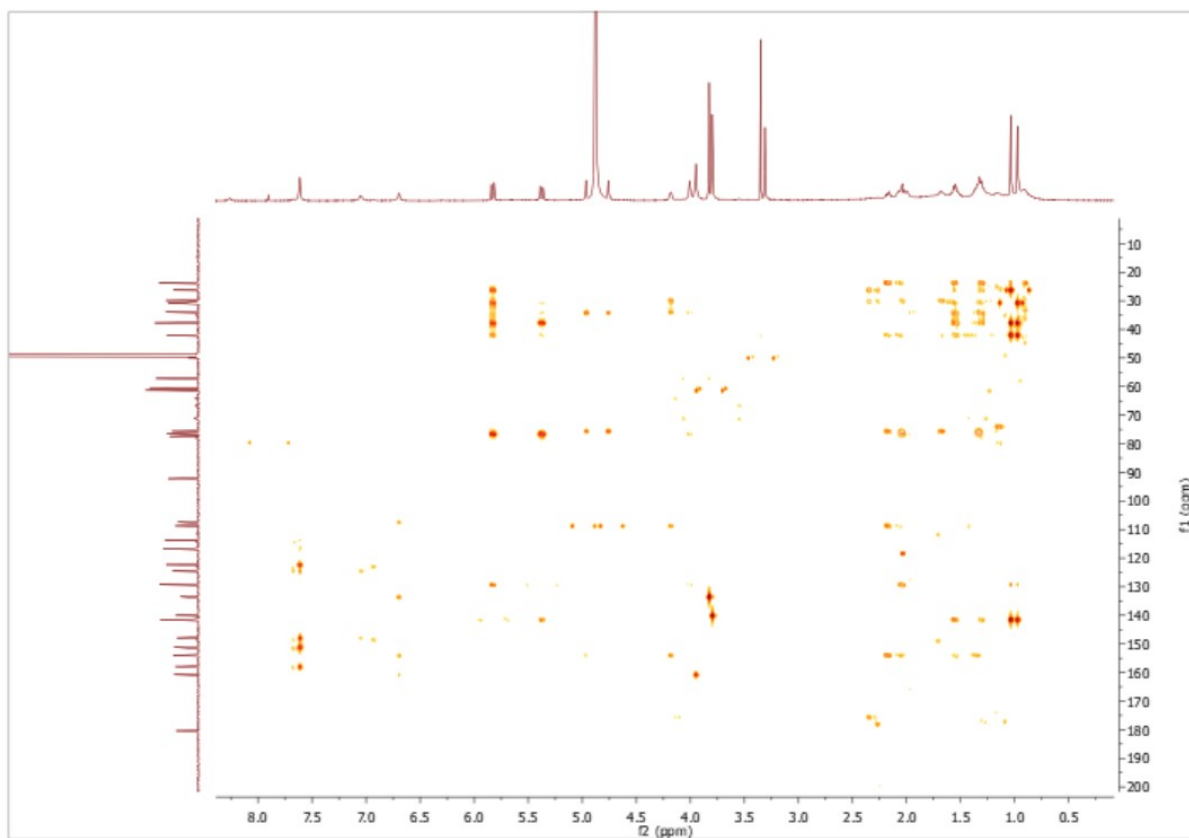

S26. ROESY (600 MHz, CD<sub>3</sub>OD) of compound **3**

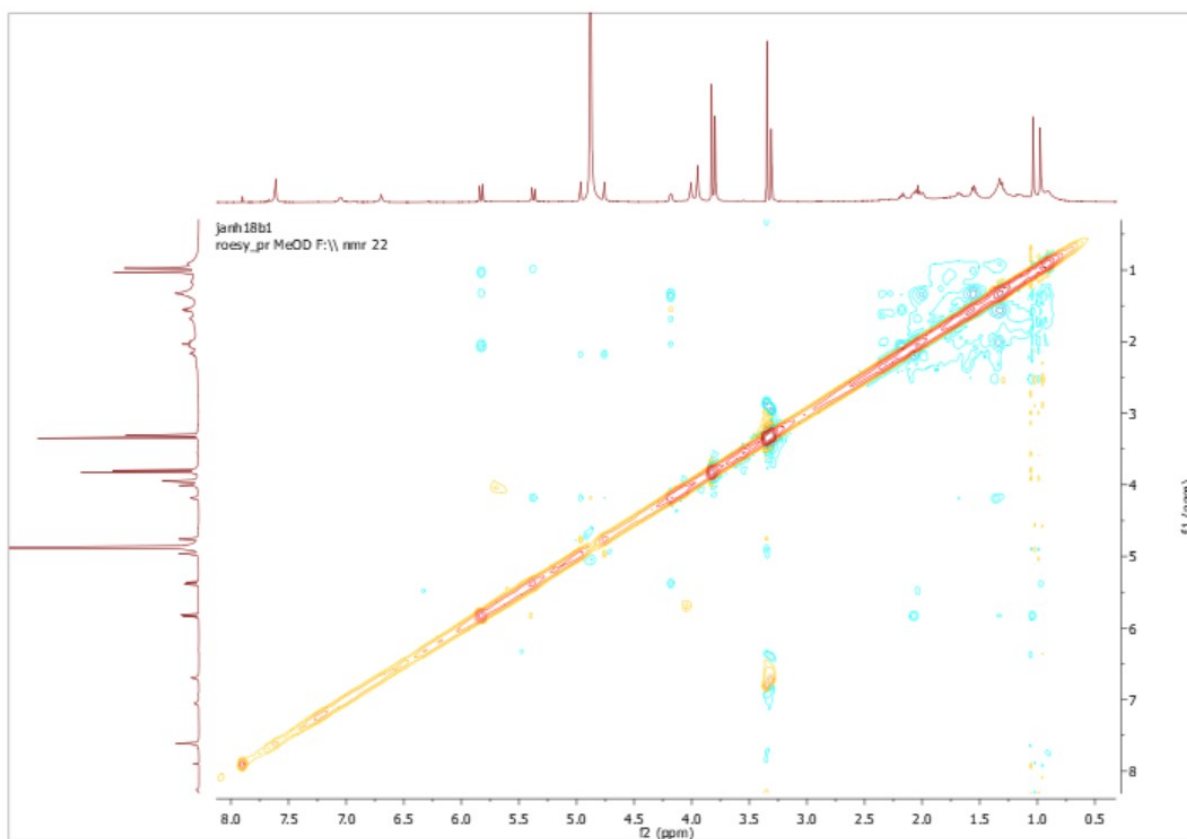

S27.  $[\alpha]_D$  spectrum of compound **3** in MeOH

**Rudolph Research Analytical**

This sample was measured on an Autopol VI, Serial #91058  
 Manufactured by Rudolph Research Analytical, Hackettstown, NJ, USA.

Measurement Date : Tuesday, 13-DEC-2022

Set Temperature : 20.0

Time Delay : Disabled

Delay between Measurement : Disabled

| <u>n</u> | <u>Average</u> | <u>Std.Dev.</u> | <u>% RSD</u> | <u>Maximum</u> | <u>Minimum</u> |
|----------|----------------|-----------------|--------------|----------------|----------------|
| 5        | -9.11          | 0.97            | -10.64       | -8.04          | -10.71         |

| <u>S.No</u> | <u>Sample ID</u> | <u>Time</u> | <u>Result</u> | <u>Scale</u> | <u>OR °Arc</u> | <u>WLG.nm</u> | <u>Lg.mm</u> | <u>Conc.g/100ml</u> | <u>Temp.</u> |
|-------------|------------------|-------------|---------------|--------------|----------------|---------------|--------------|---------------------|--------------|
| 1           | janh-18b-1       | 03:30:30 PM | -8.93         | SR           | -0.010         | 589           | 100.00       | 0.112               | 20.2         |
| 2           | janh-18b-1       | 03:30:37 PM | -10.71        | SR           | -0.012         | 589           | 100.00       | 0.112               | 20.2         |
| 3           | janh-18b-1       | 03:30:43 PM | -8.93         | SR           | -0.010         | 589           | 100.00       | 0.112               | 20.2         |
| 4           | janh-18b-1       | 03:30:50 PM | -8.93         | SR           | -0.010         | 589           | 100.00       | 0.112               | 20.1         |
| 5           | janh-18b-1       | 03:30:57 PM | -8.04         | SR           | -0.009         | 589           | 100.00       | 0.112               | 20.1         |

S28. IR of compound 3

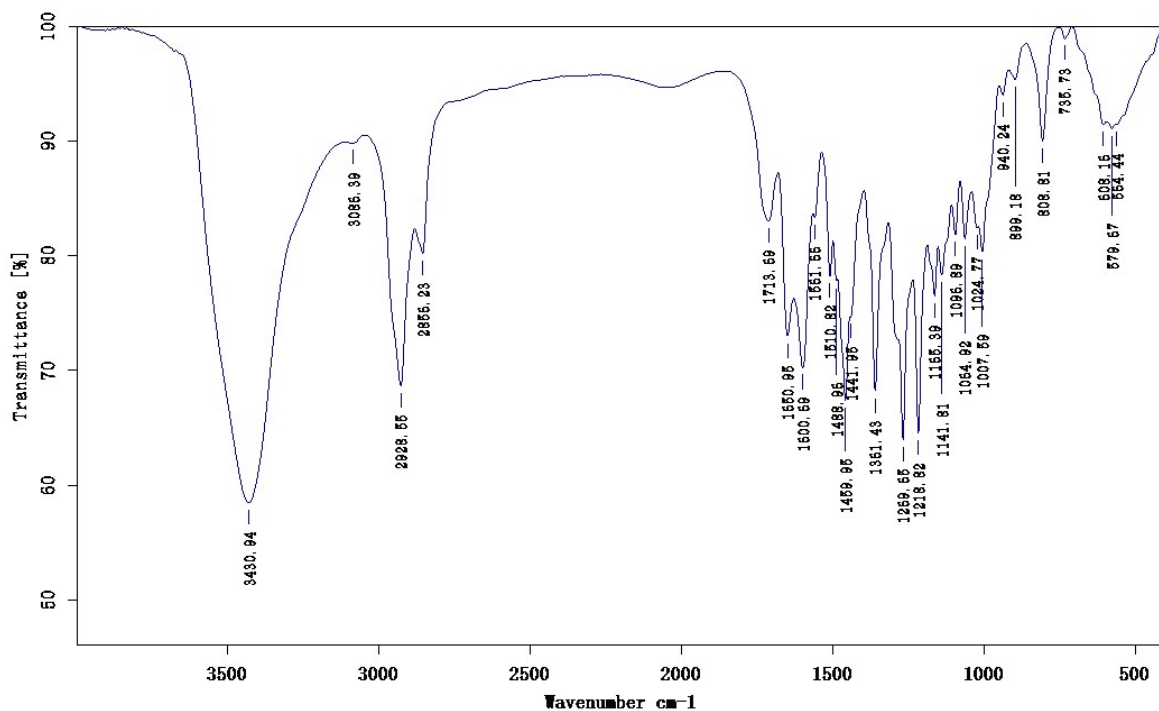

Sample Name: Janh-18b-1  
 Sample Form: KBr  
 Path of File: E:\data  
 Date of Measurement: 2023/1/16

Resolution: 4  
 Aperture Setting: 6 mm  
 Number of Background Scans: 16  
 Number of Sample Scans: 16

Beamsplitter Setting: KBr  
 Source Setting: MIR  
 Instrument Type: BRUKER VERTEX 70  
 Soft Version: OPUS 8.1



S29. ECD and UV of compound 3

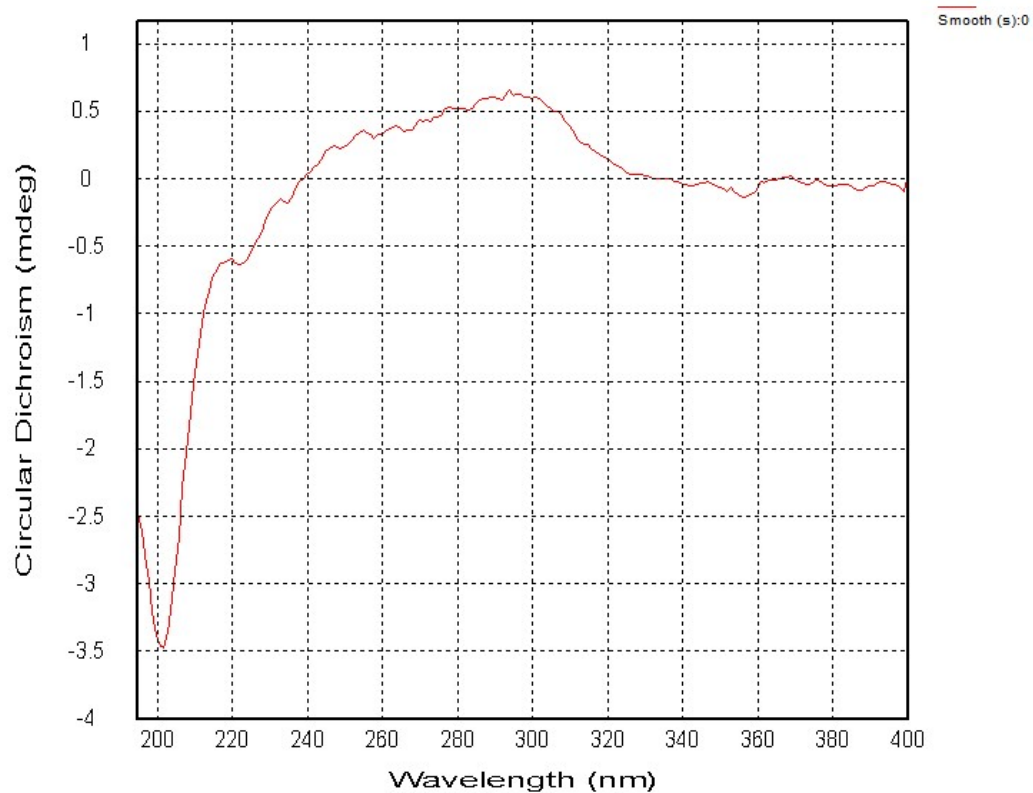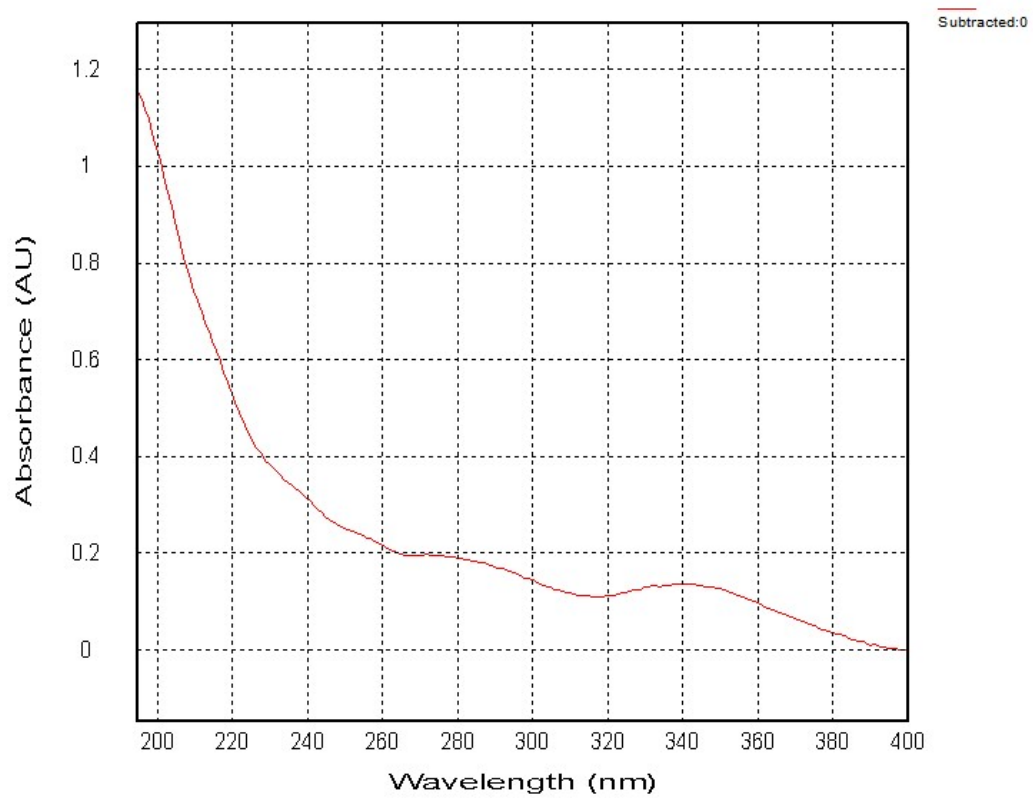

### S30. HRESIMS of compound 3

| Elmt | Val. | Min | Max | Elmt | Val. | Min | Max | Use Adduct |
|------|------|-----|-----|------|------|-----|-----|------------|
| H    | 1    | 0   | 300 | O    | 2    | 0   | 12  | H          |
| C    | 4    | 0   | 150 | 15N  | 3    | 0   | 0   | Na         |
| N    | 3    | 0   | 1   |      |      |     |     |            |

Error Margin (ppm): 50  
 HC Ratio: unlimited  
 Max Isotopes: all  
 MSn Iso RI (%): 75.00

DBE Range: -2.0 - 1000.0  
 Apply N Rule: yes  
 Isotope RI (%): 1.00  
 MSn Logic Mode: AND

Electron Ions: both  
 Use MSn Info: no  
 Isotope Res: 10000  
 Max Results: 500

Event#: 1 MS(E+) Ret. Time : 11.505 Scan#: 1649

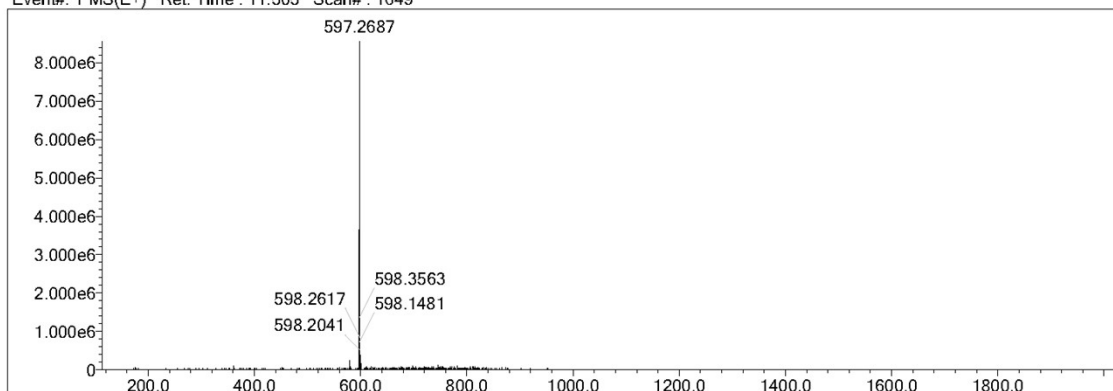

Measured region for 597.2687 m/z

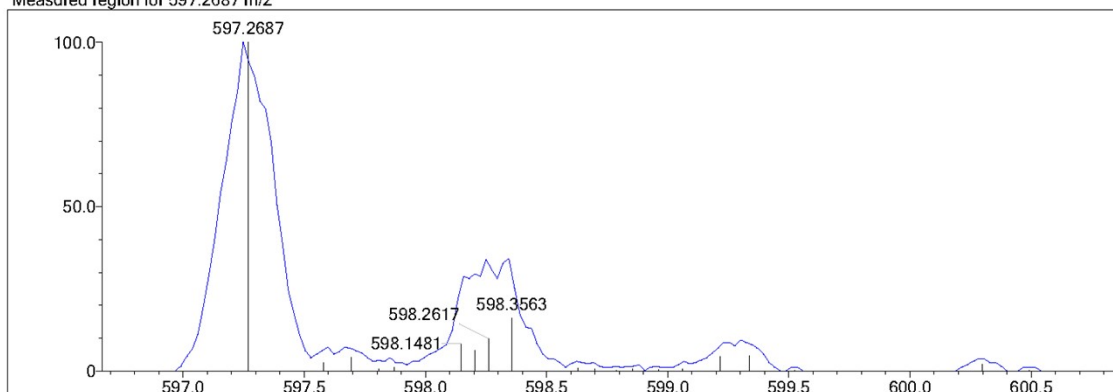

C33 H40 O10 [M+H]<sup>+</sup> : Predicted region for 597.2694 m/z

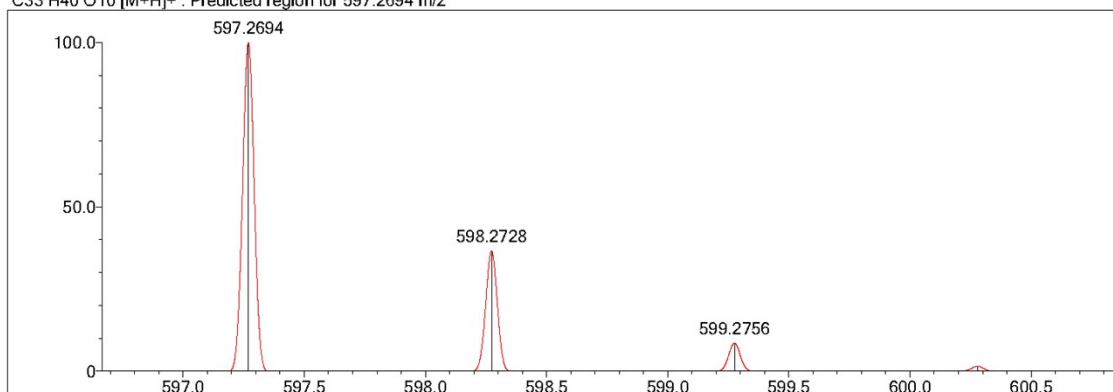

| Rank | Score | Formula (M) | Ion                | Meas. m/z | Pred. m/z | Df. (mDa) | Df. (ppm) | Iso   | DBE  |
|------|-------|-------------|--------------------|-----------|-----------|-----------|-----------|-------|------|
| 2    | 41.25 | C33 H40 O10 | [M+H] <sup>+</sup> | 597.2687  | 597.2694  | -0.7      | -1.17     | 41.43 | 14.0 |
